# Supplementary material for: Palladium-catalyzed [4 + 4] cycloaddition of 2-pyrones with 2-alkylidenetrimethylene carbonates: access to bridged eight-membered oxygen heterocycles
Source: Royal Society of Chemistry journal article supplement (doi:10.1039/d4qo00329b), 2024-01-01
Supplement: d4qo00329b1.pdf [file d4qo00329b1.pdf]

# Palladium-catalyzed [4+4] cycloaddition of 2-pyrones with 2-alkylidenetrimethylene carbonates: access to bridged eight-membered oxygen heterocycles

Huawei Lin,<sup>‡a</sup> Biming Mao,<sup>‡c</sup> Bing Han,<sup>a</sup> Jiayi Luo,<sup>a</sup> Yanqing Ge,<sup>a</sup> Xuerui Zhang,<sup>c</sup> Chang Wang,<sup>\*c</sup> Hongchao Guo,<sup>\*b</sup> Chunhao Yuan<sup>\*a</sup>

<sup>a</sup>*School of Chemistry and Pharmaceutical Engineering, Shandong First Medical University & Shandong Academy of Medical Sciences, Taian 271016, Shandong, P. R. China. E-mail: yuanchunhao2017@163.com.*

<sup>b</sup>*Department of Applied Chemistry, China Agricultural University, Beijing 100193, P. R. China. E-mail: hchgao@cau.edu.cn.*

<sup>c</sup>*School of Pharmaceutical Sciences & Institute of Materia Medica, Shandong First Medical University & Shandong Academy of Medical Sciences, Jinan 250117, Shandong, P. R. China. E-mail: wangchangxues@163.com.*

<sup>‡</sup> *These three authors contributed equally to this work.*

## Contents

|                                                                 |         |
|-----------------------------------------------------------------|---------|
| General Information                                             | S2      |
| Table S1. Optimization of Reaction Conditions                   | S2      |
| Preparation of 2-alkylidenetrimethylene carbonates <b>1a-1n</b> | S3      |
| Preparation of 2-pyrones <b>2a-2k</b>                           | S3      |
| General Procedure for the reaction                              | S4      |
| Characterization Data for <b>3, 4</b> and <b>5</b>              | S4-S15  |
| NMR Spectra of <b>3, 4</b> and <b>5</b>                         | S16-S41 |
| X-Ray Crystallographic Data of <b>3ha</b>                       | S42-S43 |

## General Information

$^1\text{H}$  and  $^{13}\text{C}$  NMR spectra were recorded in  $\text{CDCl}_3$  using a 400 MHz NMR instrument (referenced internally to  $\text{Me}_4\text{Si}$ ). Proton chemical shifts are reported in parts per million ( $\delta$  scale). Organic solutions were concentrated under reduced pressure on a rotary evaporator. Reactions were monitored through thin layer chromatography (TLC) on silica gel–precoated glass plates. Chromatograms were visualized by fluorescence quenching with UV light at 254 nm. Flash column chromatography was performed using Qingdao Haiyang flash silica gel (200–300 mesh). Accurate mass measurements were performed using Agilent 1260/1290infinity II-6546QTOF. Melting points were determined on a Stuard SMP<sub>3</sub> melting point apparatus. X-ray crystallographic data were collected using a Bruker APEX-II CCD. Unless otherwise stated, all reagents were purchased from commercial suppliers and used without further purification. All heating reactions are performed by using an oil bath.

**Table S1. Optimization of the reaction conditions<sup>a</sup>**

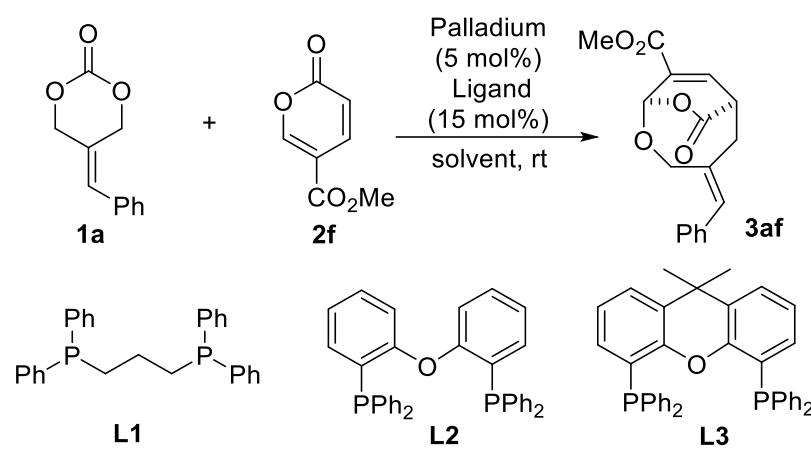

Reaction scheme showing the synthesis of **3af** from **1a** and **2f** using Palladium (5 mol%) and Ligand (15 mol%) in solvent at room temperature (rt). The structures of the ligands **L1**, **L2**, and **L3** are also shown.

| Entry | Palladium                                       | Ligand         | Solvent                  | Yield(%) <sup>b</sup> | dr <sup>c</sup> |
|-------|-------------------------------------------------|----------------|--------------------------|-----------------------|-----------------|
| 1     | $\text{Pd}(\text{PPh}_3)_4$                     |                | $\text{CH}_3\text{CN}$   | 69%                   | >20:1           |
| 2     | $\text{Pd}_2(\text{dba})_3 \cdot \text{CHCl}_3$ | <b>L1</b>      | $\text{CH}_2\text{Cl}_2$ | NR                    | >20:1           |
| 3     | $\text{Pd}_2(\text{dba})_3 \cdot \text{CHCl}_3$ | <b>L2</b>      | $\text{CH}_2\text{Cl}_2$ | 43                    | >20:1           |
| 4     | $\text{Pd}_2(\text{dba})_3 \cdot \text{CHCl}_3$ | <b>L3</b>      | $\text{CH}_2\text{Cl}_2$ | 50                    | >20:1           |
| 5     | $\text{Pd}_2(\text{dba})_3 \cdot \text{CHCl}_3$ | $\text{PPh}_3$ | $\text{CH}_2\text{Cl}_2$ | 17                    | >20:1           |
| 6     | $\text{Pd}_2(\text{dba})_3 \cdot \text{CHCl}_3$ | <b>L3</b>      | THF                      | 40                    | >20:1           |

|   |                                                 |           |                        |    |       |
|---|-------------------------------------------------|-----------|------------------------|----|-------|
| 7 | $\text{Pd}_2(\text{dba})_3 \cdot \text{CHCl}_3$ | <b>L3</b> | $\text{CH}_3\text{CN}$ | NR | >20:1 |
| 8 | $\text{Pd}_2(\text{dba})_3 \cdot \text{CHCl}_3$ | <b>L3</b> | DCE                    | 90 | >20:1 |
| 9 | $\text{Pd}_2(\text{dba})_3 \cdot \text{CHCl}_3$ | <b>L3</b> | toluene                | NR | >20:1 |

<sup>a</sup>Unless noted otherwise, reactions were performed with **1a** (0.18 mmol), **2f** (0.15 mmol), palladium (5 mol%), and ligand (15 mol%) in solvent at 25 °C. <sup>b</sup>Isolated yield. <sup>c</sup>Determined by <sup>1</sup>H NMR analysis, Z/E > 20:1.

## General procedure for the Synthesis of matrerails

### Preparation of 2-alkylidenetrimethylene carbonates **1a-1n**.<sup>[1]</sup>

2-Alkylidenetrimethylene carbonates **1a-1n** was prepared by the reported procedure.

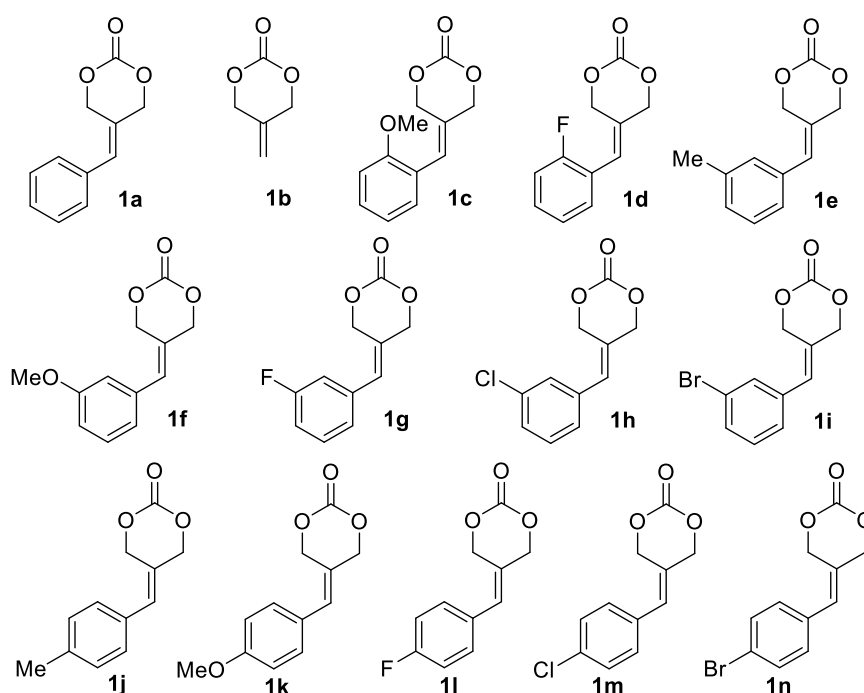

### Preparation of 2-pyrones **2a-2k**.<sup>[2],[3]</sup>

2-Pyrones **2a-2k** was prepared by the reported procedure.

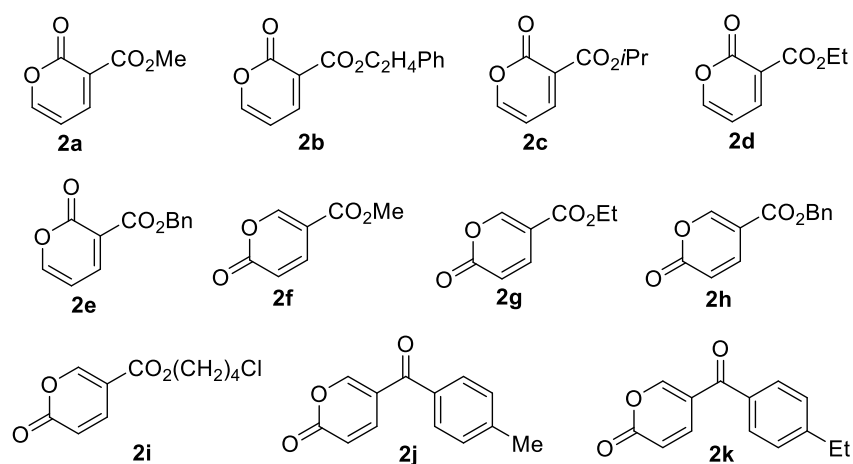

## General procedure for the reaction

Under a nitrogen atmosphere, an oven-dried 10 mL of Schlenk tube was charged with palladium catalyst (5 mol%, 0.0075 mmol), ligand (15 mol%, 0.0225 mmol) and 2-pyrones **2** (0.15 mmol) in 1 mL of solvent 25 °C, then a solution of 2-alkylidenetrimethylene carbonates **1** (0.18 mmol, 1.2 equiv) in 1 mL of solvent was added after 30 min. The resulting mixture was stirred until the starting materials were completely consumed (monitored by TLC) and then was concentrated to dryness. The residue was purified through flash column chromatography to afford the corresponding products **3aa-3na**, **3ab-3ak**.

## Characterization Data for 3, 4 and 5

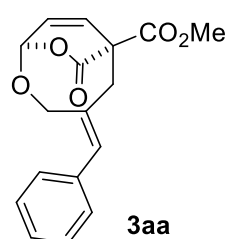

**Methyl**

**(Z)-4-benzylidene-7-oxo-2,8-dioxabicyclo[4.2.2]dec-9-ene-6-carboxylate (3aa)**

The product mixture was purified by silica gel column chromatography (PE/EtOAc = 7:1) to afford **3aa** as a white solid (44.5 mg, 92% yield). m.p. 147-149 °C; <sup>1</sup>H NMR (400 MHz, CDCl<sub>3</sub>) δ 7.47 – 7.40 (m, 2H), 7.34 – 7.25 (m, 2H), 7.27 – 7.19 (m, 1H), 6.73 (s, 1H), 6.38 (d, *J* = 9.5 Hz, 1H), 6.11 – 6.05 (m, 1H), 6.06 – 5.98 (m, 1H), 4.26 (d, *J* = 12.4 Hz, 1H), 4.03 (d, *J* = 12.4 Hz, 1H), 3.78 (s, 3H), 3.35 (dd, *J* = 10.2, 0.03 Hz, 1H), 2.55 (dd, *J* = 11.3, 1.0 Hz, 1H). <sup>13</sup>C NMR (101 MHz, CDCl<sub>3</sub>) δ 168.3, 167.9, 138.7, 134.6, 131.9, 130.0, 128.5, 127.2, 127.0, 120.0, 97.3, 61.7, 54.6, 52.5, 43.4. HRMS (ESI) *m/z*: [M+Na]<sup>+</sup> calcd for C<sub>17</sub>H<sub>16</sub>NaO<sub>5</sub><sup>+</sup>: 323.0890; Found: 323.0898.

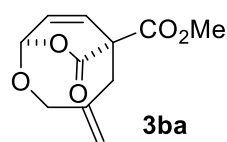

**Methyl**

**4-methylene-7-oxo-2,8-dioxabicyclo[4.2.2]dec-9-ene-6-carboxylate (3ba)**

The product mixture was purified by silica gel column chromatography (PE/EtOAc = 7:1) to afford **3ba** as a white solid (30.7 mg, 83% yield). m.p. 102-104 °C; <sup>1</sup>H NMR (400 MHz, CDCl<sub>3</sub>) δ 6.37 – 6.30 (m, 1H), 6.00 – 5.92 (m, 2H), 5.35 (s, 1H), 5.32 – 5.27 (m, 1H), 4.13 – 4.05 (m, 1H), 4.05 – 3.97 (m, 1H), 3.76 (s, 3H), 3.26 (dd, *J* =

13.9, 1.0 Hz, 1H), 2.40 (dd,  $J = 13.9, 1.3$  Hz, 1H).  $^{13}\text{C}$  NMR (101 MHz,  $\text{CDCl}_3$ )  $\delta$  168.2, 167.8, 138.6, 131.6, 125.7, 119.8, 97.0, 66.0, 54.3, 52.4, 41.5. HRMS (ESI)  $m/z$ :  $[\text{M}+\text{Na}]^+$  calcd for  $\text{C}_{11}\text{H}_{12}\text{NaO}_5^+$ : 247.0577; Found: 247.0585.

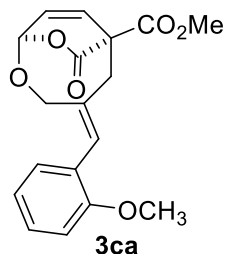

**Methyl**

**(Z)-4-(2-methoxybenzylidene)-7-oxo-2,8-dioxabicyclo[4.2.2]dec-9-ene-6-carboxylate (3ca)**

The product mixture was purified by silica gel column chromatography (PE/EtOAc = 7:1) to afford **3ca** as a white solid (38.6 mg, 73% yield). m.p. 147-149 °C;  $^1\text{H}$  NMR (400 MHz,  $\text{CDCl}_3$ )  $\delta$  7.70 – 7.65 (m, 1H), 7.25 – 7.20 (m, 1H), 6.95 – 6.87 (m, 2H), 6.81 – 6.75 (m, 1H), 6.40 – 6.33 (m, 1H), 6.09 – 6.04 (m, 1H), 6.04 – 5.96 (m, 1H), 4.22 (d,  $J = 12.4$  Hz, 1H), 4.02 (d,  $J = 12.4$  Hz, 1H), 3.77 (s, 3H), 3.74 (s, 3H), 3.41 (dd,  $J = 10.2, 1.1$  Hz, 1H), 2.57 (dd,  $J = 13.7, 1.7$  Hz, 1H).  $^{13}\text{C}$  NMR (101 MHz,  $\text{CDCl}_3$ )  $\delta$  168.4, 167.9, 156.2, 134.5, 132.0, 130.8, 129.5, 128.6, 123.6, 120.0, 119.3, 109.0, 97.3, 61.9, 54.6, 54.4, 52.4, 43.7. HRMS (ESI)  $m/z$ :  $[\text{M}+\text{Na}]^+$  calcd for  $\text{C}_{18}\text{H}_{18}\text{NaO}_6^+$ : 353.0996; Found: 353.1003.

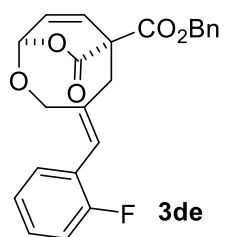

**Benzyl**

**(Z)-4-(2-fluorobenzylidene)-7-oxo-2,8-dioxabicyclo[4.2.2]dec-9-ene-6-carboxylate (3de)**

The product mixture was purified by silica gel column chromatography (PE/EtOAc = 7:1) to afford **3de** as a white solid (45.0 mg, 76% yield). m.p. 79-81 °C;  $^1\text{H}$  NMR (400 MHz,  $\text{CDCl}_3$ )  $\delta$  7.73 (td,  $J = 7.7, 1.8$  Hz, 1H), 7.32 – 7.19 (m, 6H), 7.09 (t,  $J = 7.3$  Hz, 1H), 6.99 – 6.92 (m, 1H), 6.83 (s, 1H), 6.36 (d,  $J = 9.5$  Hz, 1H), 6.13 – 5.84 (m, 2H), 5.21 (q,  $J = 12.3$  Hz, 2H), 4.19 (d,  $J = 12.5$  Hz, 1H), 4.03 (d,  $J = 12.5$  Hz, 1H), 3.41 (d,  $J = 13.4$  Hz, 1H), 2.58 (dd,  $J = 13.8, 1.8$  Hz, 1H).  $^{13}\text{C}$  NMR (101 MHz,  $\text{CDCl}_3$ )  $\delta$  167.6, 167.5, 159.3 (d,  $J = 248.7$  Hz), 134.0, 132.0, 131.9, 131.2 (d,  $J = 4.6$  Hz), 131.0 (d,  $J = 2.4$  Hz), 129.0 (d,  $J = 8.2$  Hz), 127.6, 127.5, 127.2, 122.9 (d,  $J = 3.7$  Hz), 122.4 (d,  $J = 13.2$  Hz), 120.0, 114.0 (d,  $J = 21.6$  Hz), 97.2, 67.1, 61.3, 54.5, 43.4. HRMS (ESI)  $m/z$ :  $[\text{M}+\text{Na}]^+$  calcd for  $\text{C}_{23}\text{H}_{19}\text{FNaO}_5^+$ : 417.1109; Found: 417.1118.

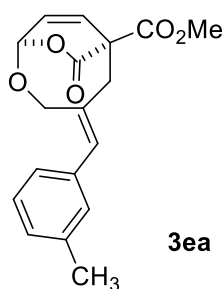

**3ea**

**Methyl**

**(Z)-4-(3-methylbenzylidene)-7-oxo-2,8-dioxabicyclo[4.2.2]dec-9-ene-6-carboxylate (3ea)**

The product mixture was purified by silica gel column chromatography (PE/EtOAc = 7:1) to afford **3ea** as a white solid (40.9 mg, 81% yield). m.p. 93-95 °C ; <sup>1</sup>H NMR (400 MHz, CDCl<sub>3</sub>) δ 7.27 – 7.21 (m, 2H), 7.20 – 7.18 (m, 1H), 7.04 (d, *J* = 7.5 Hz, 1H), 6.69 (s, 1H), 6.36 (d, *J* = 9.5 Hz, 1H), 6.07 (d, *J* = 4.2 Hz, 1H), 6.05 – 5.97 (m, 1H), 4.26 (d, *J* = 12.4 Hz, 1H), 4.01 (d, *J* = 12.4 Hz, 1H), 3.77 (s, 3H), 3.33 (dd, *J* = 13.7, 1.4 Hz, 1H), 2.54 (dd, *J* = 13.6, 1.6 Hz, 1H), 2.29 (s, 3H). <sup>13</sup>C NMR (101 MHz, CDCl<sub>3</sub>) δ 168.4, 167.9, 138.8, 136.8, 134.6, 131.9, 129.9, 129.1, 127.8, 127.1, 125.6, 120.1, 97.3, 61.4, 54.6, 52.4, 43.5, 20.4. HRMS (ESI) *m/z*: [M+Na]<sup>+</sup> calcd for C<sub>18</sub>H<sub>18</sub>NaO<sub>5</sub><sup>+</sup>: 337.1046; Found: 337.1043.

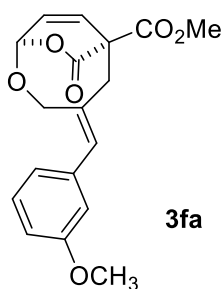

**3fa**

**Methyl**

**(Z)-4-(3-methoxybenzylidene)-7-oxo-2,8-dioxabicyclo[4.2.2]dec-9-ene-6-carboxylate (3fa)**

The product mixture was purified by silica gel column chromatography (PE/EtOAc = 7:1) to afford **3fa** as a white solid (42.3 mg, 80% yield). m.p. 156-158 °C ; <sup>1</sup>H NMR (400 MHz, CDCl<sub>3</sub>) δ 7.22 – 7.19 (m, 1H), 7.04 (dt, *J* = 2.1, 1.0 Hz, 1H), 7.01 – 6.97 (m, 1H), 6.82 – 6.75 (m, 1H), 6.70 (s, 1H), 6.41 – 6.34 (m, 1H), 6.10 – 6.04 (m, 1H), 6.05 – 5.97 (m, 1H), 4.29 (d, *J* = 12.4 Hz, 1H), 4.02 (d, *J* = 12.4 Hz, 1H), 3.78 (s, 3H), 3.75 (s, 3H), 3.33 (dd, *J* = 10.3, 0.6 Hz, 1H), 2.54 (dd, *J* = 13.6, 1.7 Hz, 1H). <sup>13</sup>C NMR (101 MHz, CDCl<sub>3</sub>) δ 168.3, 167.9, 158.4, 138.5, 136.0, 131.9, 130.4, 128.2, 121.0, 120.1, 113.8, 112.9, 97.3, 61.4, 54.6, 54.2, 52.5, 43.4. HRMS (ESI) *m/z*: [M+Na]<sup>+</sup> calcd for C<sub>18</sub>H<sub>18</sub>NaO<sub>6</sub><sup>+</sup>: 353.0996; Found: 353.1005.

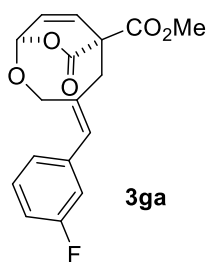

**3ga**

**Methyl**

**(Z)-4-(3-fluorobenzylidene)-7-oxo-2,8-dioxabicyclo[4.2.2]dec-9-ene-6-carboxylate (3ga)**

The product mixture was purified by silica gel column chromatography (PE/EtOAc = 7:1) to afford **3ga** as a white solid (43.4 mg, 85% yield). m.p. 156-158 °C ; <sup>1</sup>H NMR (400 MHz, CDCl<sub>3</sub>) δ 7.29 – 7.16

(m, 3H), 6.97 – 6.89 (m, 1H), 6.68 (s, 1H), 6.38 (d,  $J = 9.4$  Hz, 1H), 6.08 (d,  $J = 4.2$  Hz, 1H), 6.06 – 5.98 (m, 1H), 4.23 (d,  $J = 12.5$  Hz, 1H), 4.03 (d,  $J = 12.5$  Hz, 1H), 3.78 (s, 3H), 3.33 (dd,  $J = 10.3, 0.7$  Hz, 1H), 2.54 (dd,  $J = 13.6, 1.7$  Hz, 1H).  **$^{13}\text{C}$  NMR (101 MHz,  $\text{CDCl}_3$ )**  $\delta$  168.2, 167.8, 161.6 (d,  $J = 245.5$  Hz), 137.3 (d,  $J = 2.2$  Hz), 136.7 (d,  $J = 7.9$  Hz), 131.9, 131.5, 128.7 (d,  $J = 8.6$  Hz), 124.3 (d,  $J = 2.9$  Hz), 120.0, 115.4, 115.2, 114.0, 113.8, 97.3, 61.1, 54.5, 52.5, 43.3. **HRMS (ESI)  $m/z$ :**  $[\text{M}+\text{Na}]^+$  calcd for  $\text{C}_{17}\text{H}_{15}\text{FNaO}_5^+$ : 341.0796; Found: 341.0803.

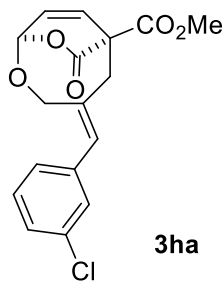

**Methyl**  
**(Z)-4-(3-chlorobenzylidene)-7-oxo-2,8-dioxabicyclo[4.2.2]dec-9-ene-6-carboxylate (3ha)**

The product mixture was purified by silica gel column chromatography (PE/EtOAc = 7:1) to afford **3ha** as a white solid (43.9 mg, 82% yield). m.p. 149-151 °C;  **$^1\text{H}$  NMR (400 MHz,  $\text{CDCl}_3$ )**  $\delta$  7.46 – 7.43 (m, 1H), 7.33 – 7.29 (m, 1H), 7.25 – 7.20 (m, 2H), 6.66 (s, 1H), 6.42 – 6.35 (m, 1H), 6.11 – 6.06 (m, 1H), 6.06 – 5.98 (m, 1H), 4.21 (d,  $J = 12.5$  Hz, 1H), 4.02 (d,  $J = 12.5$  Hz, 1H), 3.78 (s, 3H), 3.33 (dd,  $J = 10.2, 0.7$  Hz, 1H), 2.54 (dd,  $J = 13.6, 1.7$  Hz, 1H).  **$^{13}\text{C}$  NMR (101 MHz,  $\text{CDCl}_3$ )**  $\delta$  168.2, 167.7, 137.1, 136.3, 133.2, 131.9, 131.7, 128.5, 128.4, 127.1, 126.7, 120.0, 97.2, 61.07, 54.5, 52.5, 43.3. **HRMS (ESI)  $m/z$ :**  $[\text{M}+\text{Na}]^+$  calcd for  $\text{C}_{17}\text{H}_{15}\text{ClNaO}_5^+$ : 357.0500; Found: 357.0505.

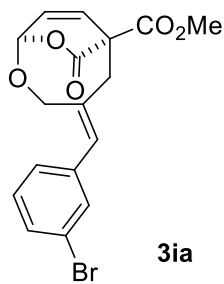

**Methyl**  
**(Z)-4-(3-bromobenzylidene)-7-oxo-2,8-dioxabicyclo[4.2.2]dec-9-ene-6-carboxylate (3ia)**

The product mixture was purified by silica gel column chromatography (PE/EtOAc = 7:1) to afford **3ia** as a white solid (52.2 mg, 87% yield). m.p. 161-163 °C;  **$^1\text{H}$  NMR (400 MHz,  $\text{CDCl}_3$ )**  $\delta$  7.59 (s, 1H), 7.38 – 7.33 (m, 2H), 7.21 – 7.13 (m, 1H), 6.65 (s, 1H), 6.38 (d,  $J = 9.5$  Hz, 1H), 6.11 – 6.06 (m, 1H), 6.06 – 5.98 (m, 1H), 4.20 (d,  $J = 12.5$  Hz, 1H), 4.02 (d,  $J = 12.5$  Hz, 1H), 3.78 (s, 3H), 3.32 (dd,  $J = 9.7, 0.2$  Hz, 1H), 2.54 (dd,  $J = 13.6, 1.5$  Hz, 1H).  **$^{13}\text{C}$  NMR (101 MHz,  $\text{CDCl}_3$ )**  $\delta$  168.2, 167.7, 137.0, 136.6, 131.9, 131.8, 131.2, 130.0, 128.8, 127.2, 121.3, 120.0, 97.2, 61.1, 54.5, 52.5, 43.2. **HRMS (ESI)  $m/z$ :**  $[\text{M}+\text{Na}]^+$

calcd for  $C_{17}H_{15}BrNaO_5^+$ : 400.9995; Found: 401.0000.

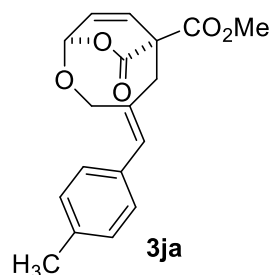

**Methyl**  
**(Z)-4-(4-methylbenzylidene)-7-oxo-2,8-dioxabicyclo[4.2.2]dec-9-ene-6-carboxylate (3ja)**

The product mixture was purified by silica gel column chromatography (PE/EtOAc = 7:1) to afford **3ja** as a white solid (39.9 mg, 79% yield). m.p. 178-180 °C;  $^1H$  NMR (400 MHz,  $CDCl_3$ )  $\delta$  7.35 – 7.29 (m, 2H), 7.12 – 7.07 (m, 2H), 6.69 (s, 1H), 6.40 – 6.33 (m, 1H), 6.09 – 6.04 (m, 1H), 6.05 – 5.97 (m, 1H), 4.26 (d,  $J$  = 12.4 Hz, 1H), 4.02 (d,  $J$  = 12.4 Hz, 1H), 3.77 (s, 3H), 3.33 (dd,  $J$  = 10.2, 0.5 Hz, 1H), 2.53 (dd,  $J$  = 13.6, 1.6 Hz, 1H), 2.28 (s, 3H).  $^{13}C$  NMR (101 MHz,  $CDCl_3$ )  $\delta$  168.4, 167.9, 138.6, 136.9, 131.9, 131.9, 129.2, 128.5, 128.0, 120.0, 97.3, 61.5, 54.7, 52.4, 43.5, 20.2. HRMS (ESI)  $m/z$ :  $[M+Na]^+$  calcd for  $C_{18}H_{18}NaO_5^+$ : 337.1046; Found: 337.1054.

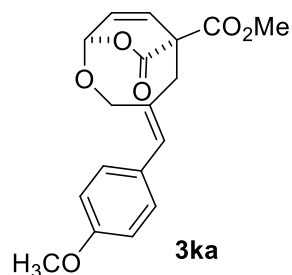

**Methyl**  
**(Z)-4-(4-methoxybenzylidene)-7-oxo-2,8-dioxabicyclo[4.2.2]dec-9-ene-6-carboxylate (3ka)**

The product mixture was purified by silica gel column chromatography (PE/EtOAc = 7:1) to afford **3ka** as a white solid (41.8 mg, 79% yield). m.p. 164-166 °C;  $^1H$  NMR (400 MHz,  $CDCl_3$ )  $\delta$  7.42 – 7.34 (m, 2H), 6.86 – 6.79 (m, 2H), 6.66 (s, 1H), 6.39 – 6.34 (m, 1H), 6.09 – 6.03 (m, 1H), 6.05 – 5.97 (m, 1H), 4.27 (d,  $J$  = 12.4 Hz, 1H), 4.03 (d,  $J$  = 12.4 Hz, 1H), 3.77 (s, 3H), 3.75 (s, 3H), 3.32 (dd,  $J$  = 10.2, 0.6 Hz, 1H), 2.52 (dd,  $J$  = 13.6, 1.6 Hz, 1H).  $^{13}C$  NMR (101 MHz,  $CDCl_3$ )  $\delta$  168.4, 168.0, 158.5, 138.2, 131.9, 130.0, 128.2, 127.4, 120.0, 112.7, 97.3, 61.6, 54.8, 54.3, 52.4, 43.6. HRMS (ESI)  $m/z$ :  $[M+Na]^+$  calcd for  $C_{18}H_{18}NaO_6^+$ : 353.0996; Found: 353.1005.

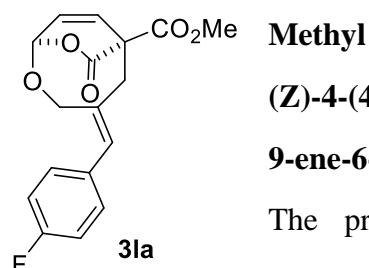

**Methyl**  
**(Z)-4-(4-fluorobenzylidene)-7-oxo-2,8-dioxabicyclo[4.2.2]dec-9-ene-6-carboxylate (3la)**

The product mixture was purified by silica gel column



chromatography (PE/EtOAc = 7:1) to afford **3la** as a white solid (41.4 mg, 81% yield). m.p. 176-178 °C; <sup>1</sup>H NMR (400 MHz, CDCl<sub>3</sub>) δ 7.45 – 7.37 (m, 2H), 7.01 – 6.94 (m, 2H), 6.68 (s, 1H), 6.38 (d, *J* = 9.4 Hz, 1H), 6.09 – 6.04 (m, 1H), 6.06 – 5.98 (m, 1H), 4.21 (d, *J* = 12.4 Hz, 1H), 4.02 (d, *J* = 12.5 Hz, 1H), 3.78 (s, 3H), 3.33 (dd, *J* = 10.2, 0.5 Hz, 1H), 2.53 (dd, *J* = 13.6, 1.5 Hz, 1H). <sup>13</sup>C NMR (101 MHz, CDCl<sub>3</sub>) δ 168.3, 167.8, 161.5 (d, *J* = 247.8 Hz), 137.5, 131.9, 130.7 (d, *J* = 3.5 Hz), 130.4 (d, *J* = 8.1 Hz), 130.1 (d, *J* = 1.0 Hz), 120.0, 114.2 (d, *J* = 21.7 Hz), 97.3, 61.3, 54.6, 52.5, 43.4. HRMS (ESI) m/z: [M+Na]<sup>+</sup> calcd for C<sub>17</sub>H<sub>15</sub>FNao<sub>5</sub><sup>+</sup> : 341.0796; Found: 341.0805.

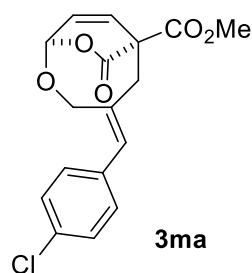

**Methyl**  
**(Z)-4-(4-chlorobenzylidene)-7-oxo-2,8-dioxabicyclo[4.2.2]dec-9-ene-6-carboxylate (3ma)**

The product mixture was purified by silica gel column chromatography (PE/EtOAc = 7:1) to afford **3ma** as a white solid (43.4 mg, 81% yield). m.p. 150-152 °C; <sup>1</sup>H NMR (400 MHz, CDCl<sub>3</sub>) δ 7.40 – 7.33 (m, 2H), 7.28 – 7.23 (m, 2H), 6.67 (s, 1H), 6.38 (d, *J* = 9.4 Hz, 1H), 6.10 – 6.04 (m, 1H), 6.06 – 5.98 (m, 1H), 4.19 (d, *J* = 12.5 Hz, 1H), 4.02 (d, *J* = 12.5 Hz, 1H), 3.78 (s, 3H), 3.33 (dd, *J* = 13.7, 1.3 Hz, 1H), 2.54 (dd, *J* = 13.6, 1.4 Hz, 1H). <sup>13</sup>C NMR (101 MHz, CDCl<sub>3</sub>) δ 168.2, 167.8, 137.3, 133.0, 133.0, 131.9, 130.9, 129.9, 127.5, 120.0, 97.2, 61.2, 54.6, 52.5, 43.3. HRMS (ESI) m/z: [M+Na]<sup>+</sup> calcd for C<sub>17</sub>H<sub>15</sub>ClNaO<sub>5</sub><sup>+</sup> : 357.0500; Found: 357.0508.

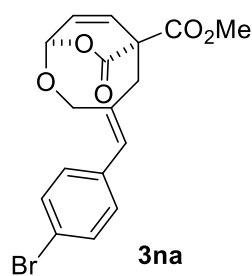

**Methyl**  
**(Z)-4-(4-bromobenzylidene)-7-oxo-2,8-dioxabicyclo[4.2.2]dec-9-ene-6-carboxylate (3na)**

The product mixture was purified by silica gel column chromatography (PE/EtOAc = 7:1) to afford **3na** as a white solid (49.8 mg, 83% yield). m.p. 150-152 °C; <sup>1</sup>H NMR (400 MHz, CDCl<sub>3</sub>) δ 7.43 – 7.39 (m, 2H), 7.32 – 7.28 (m, 2H), 6.64 (s, 1H), 6.38 (d, *J* = 9.4 Hz, 1H), 6.09 – 6.04 (m, 1H), 6.05 – 5.97 (m, 1H), 4.18 (d, *J* = 12.5 Hz, 1H), 4.01 (d, *J* = 12.5 Hz, 1H), 3.77 (s, 3H), 3.32 (dd, *J* = 13.7, 1.3 Hz, 1H), 2.52 (dd, *J* = 13.7, 1.4 Hz, 1H). <sup>13</sup>C NMR (101 MHz, CDCl<sub>3</sub>) δ 168.2, 167.8, 137.3, 133.5, 131.9, 131.0, 130.4, 130.1, 121.3, 119.9, 97.2, 61.1, 54.5, 52.5, 43.3. HRMS (ESI) m/z: [M+Na]<sup>+</sup> calcd for C<sub>17</sub>H<sub>15</sub>BrNaO<sub>5</sub><sup>+</sup> : 400.9995; Found: 401.0003.

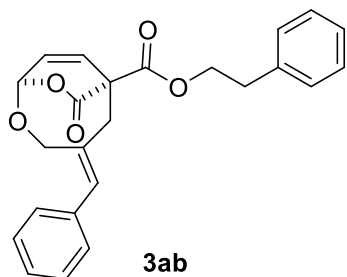

**3ab**

**Phenethyl**

**(Z)-4-benzylidene-7-oxo-2,8-dioxabicyclo[4.2.2]dec-9-ene-6-carboxylate (3ab)**

The product mixture was purified by silica gel column chromatography (PE/EtOAc = 7:1) to afford **3ab** as a yellow solid (50.1 mg, 81% yield). m.p. 97-99 °C ; <sup>1</sup>H NMR (400 MHz, CDCl<sub>3</sub>) δ 7.46 – 7.39 (m, 2H), 7.33 – 7.24 (m, 2H), 7.27 – 7.18 (m, 3H), 7.19 – 7.13 (m, 3H), 6.71 (s, 1H), 6.24 – 6.17 (m, 1H), 6.09 – 6.03 (m, 1H), 6.01 – 5.93 (m, 1H), 4.43 – 4.34 (m, 2H), 4.25 (d, *J* = 12.4 Hz, 1H), 4.00 (d, *J* = 12.4 Hz, 1H), 3.31 (dd, *J* = 13.8, 1.4 Hz, 1H), 2.99 – 2.87 (m, 2H), 2.48 (dd, *J* = 13.6, 1.6 Hz, 1H). <sup>13</sup>C NMR (101 MHz, CDCl<sub>3</sub>) δ 167.9, 167.7, 138.6, 136.3, 134.7, 131.9, 130.1, 128.5, 128.0, 127.5, 127.2, 127.0, 125.7, 119.9, 97.2, 65.8, 61.4, 54.7, 43.4, 33.8. HRMS (ESI) *m/z*: [M+Na]<sup>+</sup> calcd for C<sub>24</sub>H<sub>22</sub>NaO<sub>5</sub><sup>+</sup> : 413.1359; Found: 413.1368.

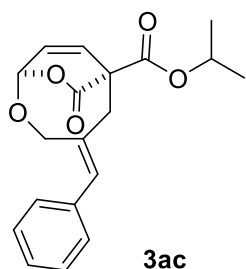

**3ac**

**Isopropyl**

**(Z)-4-benzylidene-7-oxo-2,8-dioxabicyclo[4.2.2]dec-9-ene-6-carboxylate (3ac)**

The product mixture was purified by silica gel column chromatography (PE/EtOAc = 7:1) to afford **3ac** as a yellow solid (34.5 mg, 73% yield). m.p. 115-117 °C ; <sup>1</sup>H NMR (400 MHz, CDCl<sub>3</sub>) δ 7.46 – 7.41 (m, 2H), 7.33 – 7.26 (m, 2H), 7.26 – 7.21 (m, 1H), 6.72 (s, 1H), 6.37 – 6.30 (m, 1H), 6.09 – 6.03 (m, 1H), 6.04 – 5.96 (m, 1H), 5.12 – 5.03 (m, 1H), 4.25 (d, *J* = 12.3 Hz, 1H), 4.03 (d, *J* = 12.4 Hz, 1H), 3.33 (dd, *J* = 13.8, 1.4 Hz, 1H), 2.52 (dd, *J* = 13.7, 1.6 Hz, 1H), 1.26 – 1.19 (m, 6H). <sup>13</sup>C NMR (101 MHz, CDCl<sub>3</sub>) δ 167.9, 167.3, 138.5, 134.7, 132.2, 130.3, 128.5, 127.2, 126.9, 119.9, 97.2, 69.3, 61.4, 54.6, 43.4, 20.6, 20.3. HRMS (ESI) *m/z*: [M+Na]<sup>+</sup> calcd for C<sub>19</sub>H<sub>20</sub>NaO<sub>5</sub><sup>+</sup> : 351.1203; Found: 351.1205.

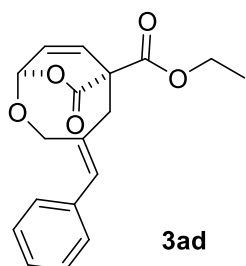

**3ad**

**Ethyl**

**(Z)-4-benzylidene-7-oxo-2,8-dioxabicyclo[4.2.2]dec-9-ene-6-carboxylate (3ad)**

The product mixture was purified by silica gel column chromatography (PE/EtOAc = 7:1) to afford **3ad** as a yellow solid (36.3 mg, 72% yield). m.p. 120-122 °C ; <sup>1</sup>H NMR (400 MHz, CDCl<sub>3</sub>) δ 7.46 –

7.40 (m, 2H), 7.33 – 7.25 (m, 2H), 7.25 – 7.20 (m, 1H), 6.72 (s, 1H), 6.40 – 6.33 (m, 1H), 6.09 – 6.04 (m, 1H), 6.04 – 5.97 (m, 1H), 4.32 – 4.17 (m, 3H), 4.03 (d,  $J = 12.4$  Hz, 1H), 3.34 (dd,  $J = 13.7, 1.4$  Hz, 1H), 2.53 (dd,  $J = 10.2, 0.9$  Hz, 1H), 1.24 (t,  $J = 7.1$  Hz, 3H).  $^{13}\text{C NMR}$  (101 MHz,  $\text{CDCl}_3$ )  $\delta$  167.9, 167.8, 138.6, 134.7, 132.1, 130.2, 128.5, 127.2, 127.0, 120.0, 97.2, 61.6, 61.4, 54.6, 43.4, 13.0. **HRMS** (ESI)  $m/z$ :  $[\text{M}+\text{Na}]^+$  calcd for  $\text{C}_{18}\text{H}_{18}\text{NaO}_5^+$  : 337.1046; Found: 337.1054.

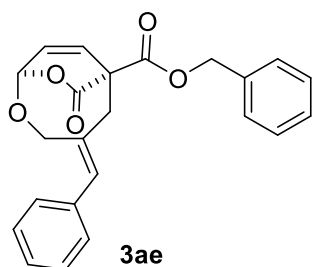

**Benzyl**

**(Z)-4-benzylidene-7-oxo-2,8-dioxabicyclo[4.2.2]dec-9-ene-6-carboxylate (3ae)**

The product mixture was purified by silica gel column chromatography (PE/EtOAc = 7:1) to afford **3ae** as a yellow solid (38.6 mg, 76% yield). m.p. 117-119 °C;  $^1\text{H NMR}$  (400 MHz,  $\text{CDCl}_3$ )  $\delta$  7.44 – 7.39 (m, 2H), 7.31 – 7.26 (m, 7H), 7.24 – 7.19 (m, 1H), 6.72 (s, 1H), 6.37 – 6.30 (m, 1H), 6.07 – 6.02 (m, 1H), 6.02 – 5.94 (m, 1H), 5.27 – 5.19 (m, 1H), 5.20 – 5.13 (m, 1H), 4.25 (d,  $J = 12.4$  Hz, 1H), 4.01 (d,  $J = 12.4$  Hz, 1H), 3.35 (dd,  $J = 8.4, 2.4$  Hz, 1H), 2.54 (dd,  $J = 13.6, 1.7$  Hz, 1H).  $^{13}\text{C NMR}$  (101 MHz,  $\text{CDCl}_3$ )  $\delta$  167.8, 167.7, 138.7, 134.7, 134.1, 131.8, 130.1, 128.5, 127.6, 127.5, 127.2, 127.2, 127.0, 120.1, 97.3, 67.1, 61.4, 54.7, 43.5. **HRMS** (ESI)  $m/z$ :  $[\text{M}+\text{Na}]^+$  calcd for  $\text{C}_{23}\text{H}_{20}\text{NaO}_5^+$  : 399.1203; Found: 399.1210.

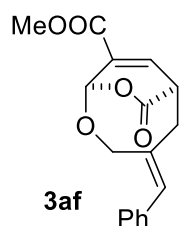

**Methyl**

**(Z)-4-benzylidene-7-oxo-2,8-dioxabicyclo[4.2.2]dec-9-ene-9-carboxylate (3af)**

The product mixture was purified by silica gel column chromatography (PE/EtOAc = 7:1) to afford **3af** as a yellow solid (43.6 mg, 90% yield). m.p. 170-172 °C;  $^1\text{H NMR}$  (400 MHz,  $\text{CDCl}_3$ )  $\delta$  7.46 – 7.37 (m, 3H), 7.32 – 7.24 (m, 2H), 7.26 – 7.18 (m, 1H), 6.65 (s, 1H), 6.46 (s, 1H), 4.27 (d,  $J = 12.8$  Hz, 1H), 3.91 – 3.83 (m, 1H), 3.77 (s, 3H), 3.74 – 3.66 (m, 1H), 2.96 (dd,  $J = 13.6, 6.9$  Hz, 1H), 2.56 (dd,  $J = 10.4, 1.3$  Hz, 1H).  $^{13}\text{C NMR}$  (101 MHz,  $\text{CDCl}_3$ )  $\delta$  169.7, 161.9, 141.3, 137.9, 134.5, 130.3, 128.5, 127.3, 127.0, 124.9, 95.9, 61.4, 51.6, 40.7, 39.9. **HRMS** (ESI)  $m/z$ :  $[\text{M}+\text{Na}]^+$  calcd for  $\text{C}_{17}\text{H}_{16}\text{NaO}_5^+$  : 323.0890; Found: 323.0899.

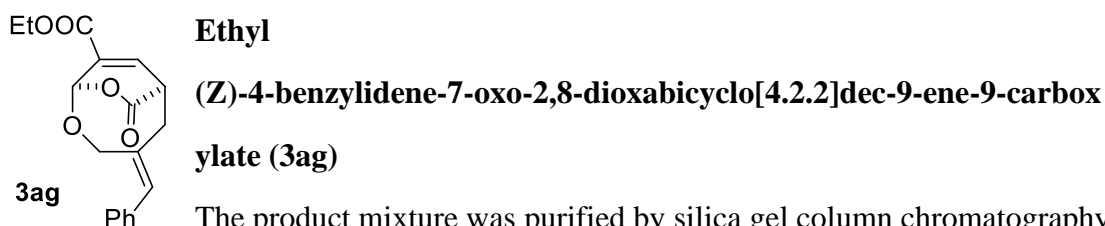

The product mixture was purified by silica gel column chromatography (PE/EtOAc = 7:1) to afford **3ag** as a yellow solid (39.3 mg, 79% yield). m.p. 150-152 °C;  $^1\text{H NMR}$  (400 MHz,  $\text{CDCl}_3$ )  $\delta$  7.45 – 7.38 (m, 3H), 7.32 – 7.26 (m, 2H), 7.25 – 7.21 (m, 1H), 6.64 (s, 1H), 6.46 (s, 1H), 4.30 – 4.18 (m, 3H), 3.91 – 3.85 (m, 1H), 3.73 – 3.65 (m, 1H), 2.96 (dd,  $J = 13.5, 6.8$  Hz, 1H), 2.56 (dd,  $J = 13.6, 1.7$  Hz, 1H), 1.27 (t,  $J = 7.1$  Hz, 3H).  $^{13}\text{C NMR}$  (101 MHz,  $\text{CDCl}_3$ )  $\delta$  169.9, 161.5, 141.0, 137.8, 134.5, 130.4, 128.5, 127.3, 127.0, 125.2, 95.9, 61.3, 60.7, 40.7, 39.9, 13.2. **HRMS** (ESI)  $m/z$ :  $[\text{M}+\text{Na}]^+$  calcd for  $\text{C}_{18}\text{H}_{18}\text{NaO}_5^+$  : 337.1046; Found: 337.1055.

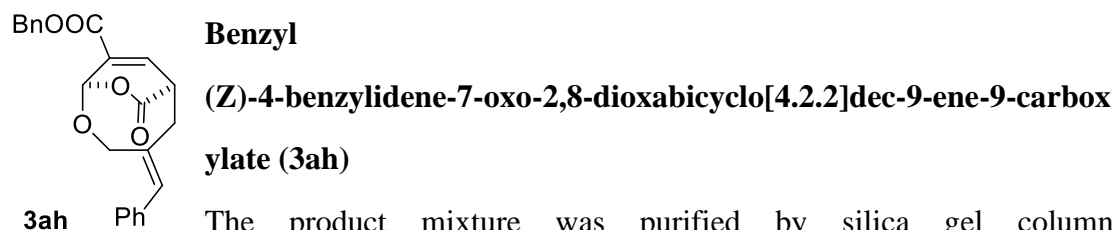

The product mixture was purified by silica gel column chromatography (PE/EtOAc = 7:1) to afford **3ah** as a yellow solid (39.7 mg, 78% yield). m.p. 121-123 °C;  $^1\text{H NMR}$  (400 MHz,  $\text{CDCl}_3$ )  $\delta$  7.44 – 7.38 (m, 3H), 7.31 – 7.25 (m, 7H), 7.24 – 7.21 (m, 1H), 6.63 (s, 1H), 6.52 – 6.45 (m, 1H), 5.22 – 5.17 (m, 2H), 4.31 – 4.19 (m, 1H), 3.87 (d,  $J = 12.8$  Hz, 1H), 3.72 – 3.63 (m, 1H), 2.95 (dd,  $J = 13.6, 6.8$  Hz, 1H), 2.55 (dd,  $J = 13.5, 1.9$  Hz, 1H).  $^{13}\text{C NMR}$  (101 MHz,  $\text{CDCl}_3$ )  $\delta$  169.8, 161.3, 141.5, 137.9, 134.5, 134.1, 130.3, 128.5, 127.7, 127.6, 127.3, 127.3, 127.0, 125.1, 95.8, 66.3, 61.3, 40.7, 40.0. **HRMS** (ESI)  $m/z$ :  $[\text{M}+\text{Na}]^+$  calcd for  $\text{C}_{23}\text{H}_{20}\text{NaO}_5^+$  : 399.1203; Found: 399.1209.

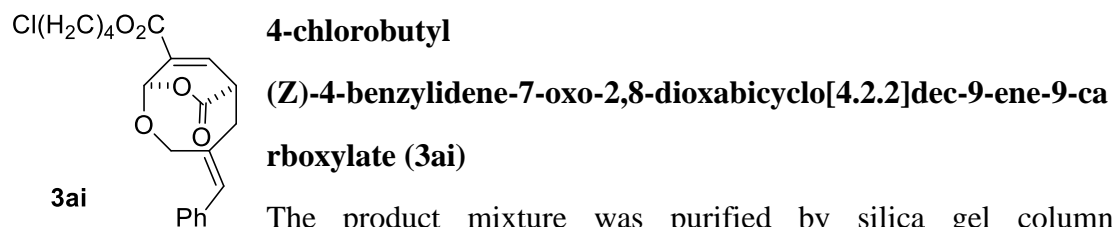

The product mixture was purified by silica gel column chromatography (PE/EtOAc = 7:1) to afford **3ai** as a yellow solid (39.7 mg, 78% yield). m.p. 116-118 °C;  $^1\text{H NMR}$  (400 MHz,  $\text{CDCl}_3$ )  $\delta$  7.44 – 7.38 (m, 3H), 7.31 – 7.26 (m, 2H), 7.25 – 7.20 (m, 1H), 6.64 (s, 1H), 6.45 (s, 1H), 4.26 (d,  $J = 12.8$  Hz,

1H), 4.23 – 4.18 (m, 2H), 3.88 (d,  $J = 12.8$  Hz, 1H), 3.74 – 3.66 (m, 1H), 3.53 – 3.44 (m, 2H), 2.97 (dd,  $J = 13.6, 6.7$  Hz, 1H), 2.57 (dd,  $J = 13.7, 1.8$  Hz, 1H), 1.85 – 1.76 (m, 4H).  $^{13}\text{C}$  NMR (101 MHz,  $\text{CDCl}_3$ )  $\delta$  169.8, 161.4, 141.2, 137.9, 134.5, 130.3, 128.5, 127.3, 127.0, 125.2, 95.8, 63.8, 61.4, 43.3, 40.7, 40.1, 28.0, 24.9. HRMS (ESI)  $m/z$ :  $[\text{M}+\text{Na}]^+$  calcd for  $\text{C}_{20}\text{H}_{21}\text{ClNaO}_5^+$  : 399.0970; Found: 399.0978.

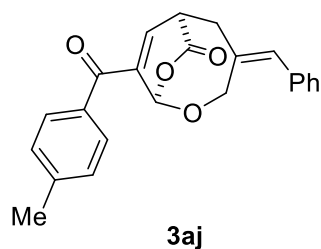

**(Z)-4-benzylidene-9-(4-methylbenzoyl)-2,8-dioxabicyclo[4.2.2]dec-9-en-7-one (3aj)**

The product mixture was purified by silica gel column chromatography (PE/EtOAc = 7:1) to afford **3aj** as a yellow solid (51.1 mg, 89% yield). m.p. 116-118 °C ;  $^1\text{H}$  NMR (400 MHz,  $\text{CDCl}_3$ )  $\delta$  7.58 (d,  $J = 8.2$  Hz, 2H), 7.47 – 7.40 (m, 2H), 7.33 – 7.24 (m, 3H), 7.27 – 7.19 (m, 2H), 7.02 – 6.95 (m, 1H), 6.68 (s, 1H), 6.56 (s, 1H), 4.36 – 4.26 (m, 1H), 4.03 – 3.95 (m, 1H), 3.78 – 3.69 (m, 1H), 3.02 (dd,  $J = 13.7, 6.5$  Hz, 1H), 2.63 (dd,  $J = 13.7, 1.9$  Hz, 1H), 2.35 (s, 3H).  $^{13}\text{C}$  NMR (101 MHz,  $\text{CDCl}_3$ )  $\delta$  190.4, 170.2, 143.1, 141.2, 137.8, 134.4, 132.6, 132.0, 130.5, 128.5, 128.4, 127.3, 127.1, 96.3, 61.4, 40.8, 40.5, 20.6. HRMS (ESI)  $m/z$ :  $[\text{M}+\text{Na}]^+$  calcd for  $\text{C}_{23}\text{H}_{20}\text{NaO}_4^+$  : 383.1254; Found: 383.1263.

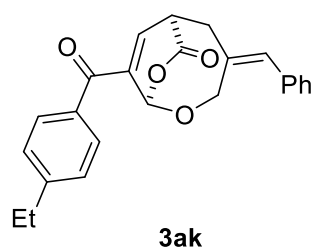

**(Z)-4-benzylidene-9-(4-ethylbenzoyl)-2,8-dioxabicyclo[4.2.2]dec-9-en-7-one (3ak)**

The product mixture was purified by silica gel column chromatography (PE/EtOAc = 7:1) to afford **3ak** as a yellow solid (47.6 mg, 80% yield). m.p. 95-97 °C ;  $^1\text{H}$  NMR (400 MHz,  $\text{CDCl}_3$ )  $\delta$  7.66 – 7.52 (m, 2H), 7.48 – 7.40 (m, 2H), 7.33 – 7.25 (m, 2H), 7.26 – 7.18 (m, 3H), 7.03 – 6.94 (m, 1H), 6.69 (s, 1H), 6.57 (s, 1H), 4.36 – 4.27 (m, 1H), 4.04 – 3.91 (m, 1H), 3.78 – 3.70 (m, 1H), 3.03 (dd,  $J = 13.7, 6.5$  Hz, 1H), 2.71 – 2.60 (m, 3H), 1.19 (t,  $J = 7.6$  Hz, 3H).  $^{13}\text{C}$  NMR (101 MHz,  $\text{CDCl}_3$ )  $\delta$  190.4, 170.2, 149.2, 141.2, 137.8, 134.5, 132.8, 132.0, 130.6, 128.6, 128.5, 127.3, 127.2, 127.1, 96.3, 61.4, 40.8, 40.5, 27.9, 14.2. HRMS (ESI)  $m/z$ :  $[\text{M}+\text{Na}]^+$  calcd for  $\text{C}_{24}\text{H}_{22}\text{NaO}_4^+$  : 397.1410; Found: 397.1419.

## Transformations of products 3aa and 3na

### 1. Oxidation of 3aa with *m*-chloroperoxybenzoic acid (*m*-CPBA)

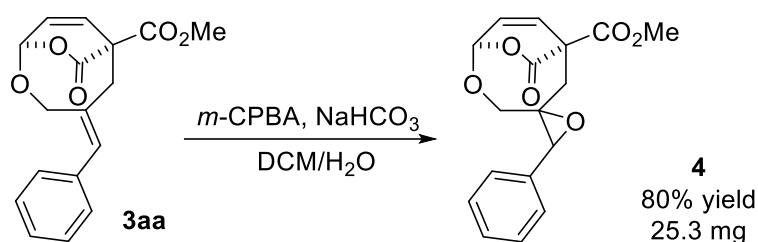

To a solution of **3aa** (0.1 mmol, 1.0 equiv) in 1mL CH<sub>2</sub>Cl<sub>2</sub> was added *m*-CPBA (2.0 equiv), NaHCO<sub>3</sub> (4.0 equiv) and 0.5mL H<sub>2</sub>O. The resulting reaction mixture was stirred at room temperature. and the reaction process was monitored by TLC. Upon full conversion, the crude product was purified by FC in silica (PE/EtOAc 4:1) to yield the product **4** (27.1 mg, 80% yield).

### Methyl

### 8-oxo-3'-phenyl-5,7-dioxaspiro[bicyclo[4.2.2]decane-3,2'-oxiran]-9-ene-1-carboxylate (**4**)

The product mixture was purified by silica gel column chromatography (PE/EtOAc 4:1) to afford **4** as a yellow oil. <sup>1</sup>H NMR (400 MHz, CDCl<sub>3</sub>) δ 7.40 – 7.34 (m, 2H), 7.33 – 7.24 (m, 3H), 6.44 – 6.37 (m, 1H), 5.99 – 5.91 (m, 1H), 5.81 – 5.76 (m, 1H), 4.05 (d, *J* = 13.3 Hz, 1H), 3.91 (s, 1H), 3.78 (s, 3H), 3.53 (d, *J* = 13.3 Hz, 1H), 2.41 (s, 2H). <sup>13</sup>C NMR (101 MHz, CDCl<sub>3</sub>) δ 167.7, 167.5, 133.1, 131.9, 127.0, 126.9, 125.5, 120.2, 96.7, 65.2, 63.5, 59.3, 52.7, 51.1, 41.3. HRMS (ESI) *m/z*: [M+Na]<sup>+</sup> calcd for C<sub>17</sub>H<sub>16</sub>NaO<sub>6</sub><sup>+</sup> : 339.0839; Found: 339.0844.

### 2. Nucleophilic addition of 3na

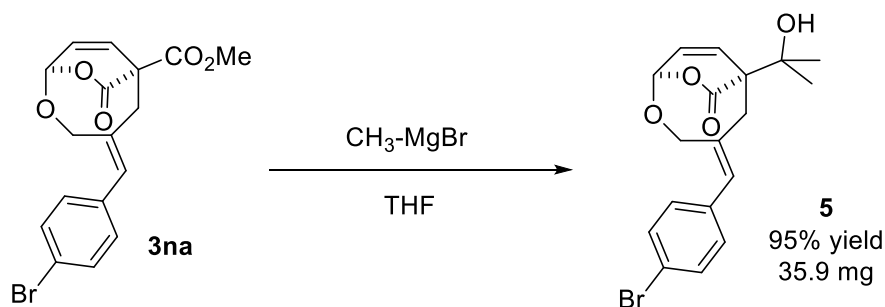

To a solution of **3na** (0.1 mmol) in 1mL THF was added dropwisely a solution of methylmagnesium bromide (0.5 M in THF, 5.0 equiv) at 0 °C. The resulting reaction

mixture was stirred at room temperature for 4h and the reaction process was monitored by TLC. Upon full conversion, the crude product was purified by FC in silica (PE/EtOAc 7:1) to yield the product **5** (38.1 mg, 95% yield).

**(Z)-4-(4-bromobenzylidene)-6-(2-hydroxypropan-2-yl)-2,8-dioxabicyclo[4.2.2]dec-9-en-7-one (5)**

The product mixture was purified by silica gel column chromatography (PE/EtOAc = 7:1) to afford **5** as a white solid. m.p. 161-163 °C; <sup>1</sup>H NMR (400 MHz, CDCl<sub>3</sub>) δ 7.46 – 7.38 (m, 2H), 7.34 – 7.27 (m, 2H), 6.61 (s, 1H), 6.31 (d, *J* = 9.7 Hz, 1H), 6.05 – 6.00 (m, 1H), 6.01 – 5.93 (m, 1H), 4.92 (s, 1H), 4.19 (d, *J* = 12.3 Hz, 1H), 4.00 (d, *J* = 12.3 Hz, 1H), 3.26 (dd, *J* = 12.9, 1.5 Hz, 1H), 2.30 (dd, *J* = 12.8, 1.4 Hz, 1H), 1.23 (s, 6H). <sup>13</sup>C NMR (101 MHz, CDCl<sub>3</sub>) δ 174.9, 136.4, 133.8, 133.7, 132.6, 130.4, 130.2, 121.1, 120.2, 96.8, 72.2, 61.5, 53.4, 41.8, 26.6, 21.7. HRMS (ESI) m/z: [M+Na]<sup>+</sup> calcd for C<sub>18</sub>H<sub>19</sub>BrNaO<sub>4</sub><sup>+</sup> : 401.0359; Found: 401.0358.

## References:

- [1] R. Shintani, K. Moriya and T. Hayashi, Guiding the nitrogen nucleophile to the middle: palladium-catalyzed decarboxylative cyclopropanation of 2-alkylidenetrimethylene carbonates with isocyanates, *Chem. Commun.*, **2011**, 47, 3057-3059.
- [2] X. G. Si, Z. M. Zhang, C. G. Zheng, Z. T. Li and Q. Cai, Enantioselective Synthesis of cis-Decalin Derivatives by the Inverse-Electron-Demand Diels–Alder Reaction of 2-Pyrones, *Angew. Chem., Int. Ed.*, **2020**, 59, 18412-18417.
- [3] X. Gao, M. Xia, C. Yuan, L. Zhou, W. Sun, C. Li, B. Wu, D. Zhu, C. Zhang, B. Zheng, D. Wang and H. Guo, Enantioselective Synthesis of Chiral Medium-Sized Cyclic Compounds via Tandem Cycloaddition/Cope Rearrangement Strategy, *ACS Catal.*, **2019**, 9, 1645-1654.

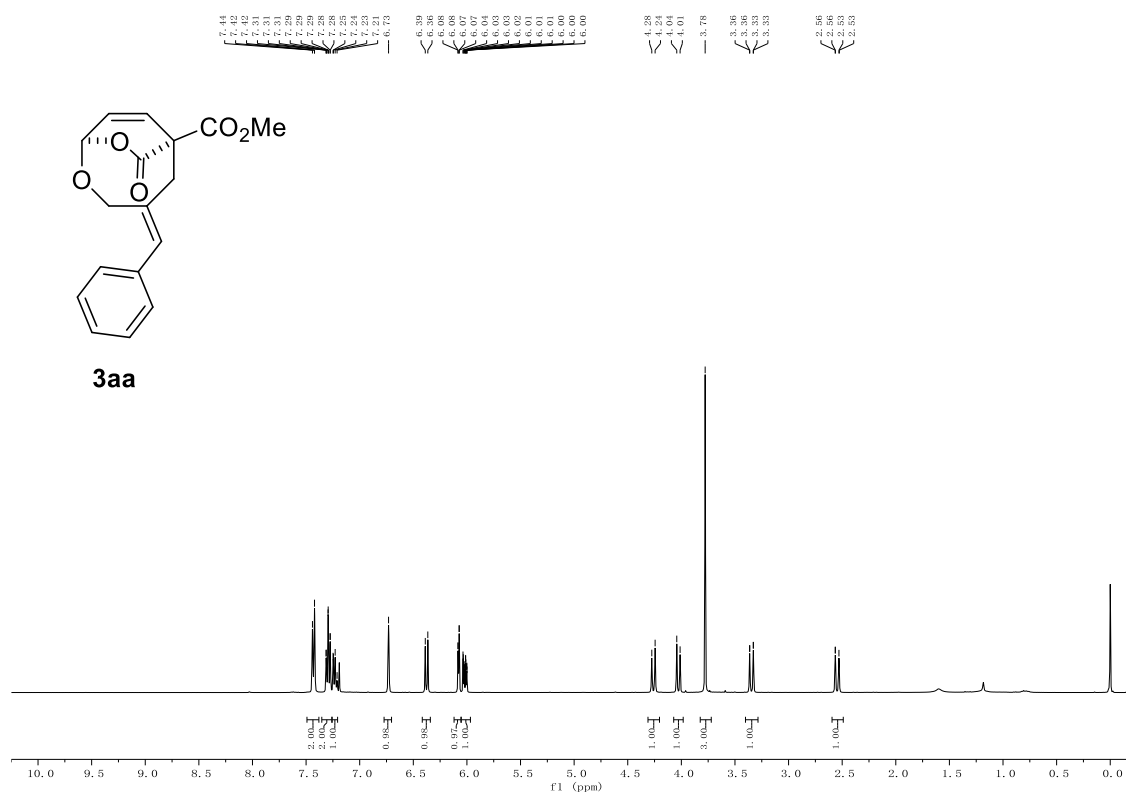

$^1\text{H}$  NMR of **3aa** (400 MHz,  $\text{CDCl}_3$ )

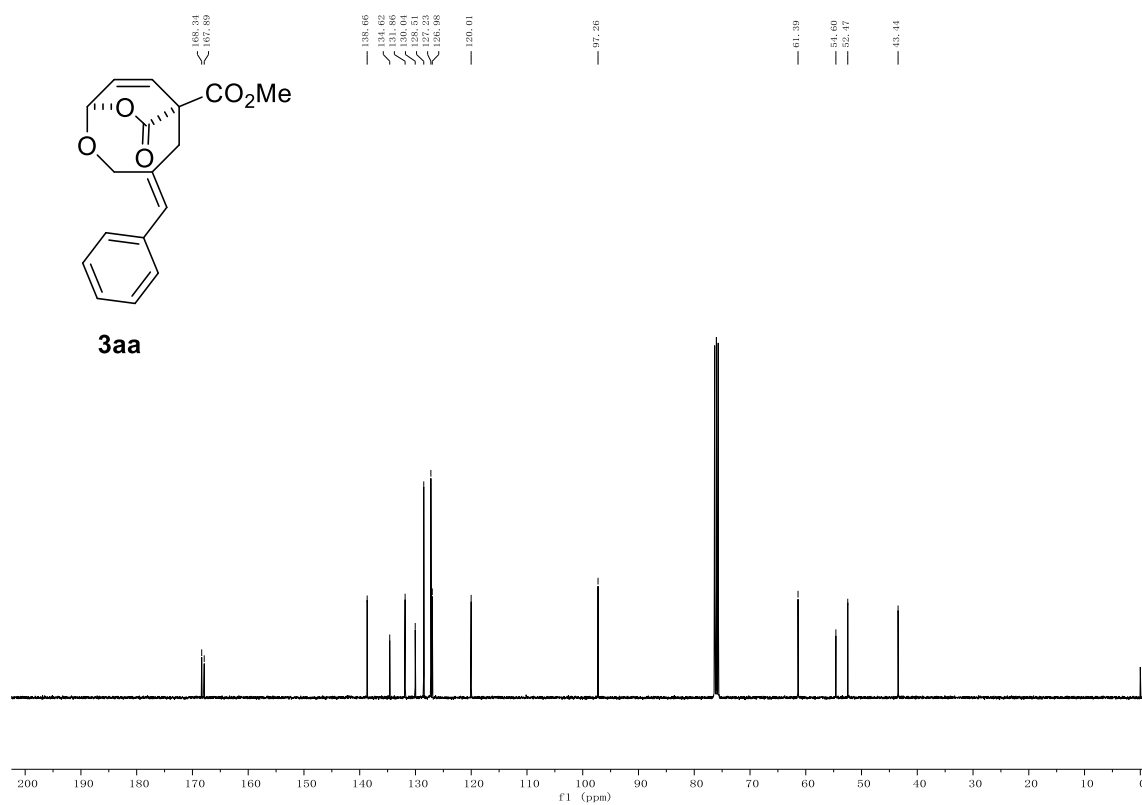

$^{13}\text{C}$  NMR of **3aa** (101 MHz,  $\text{CDCl}_3$ )



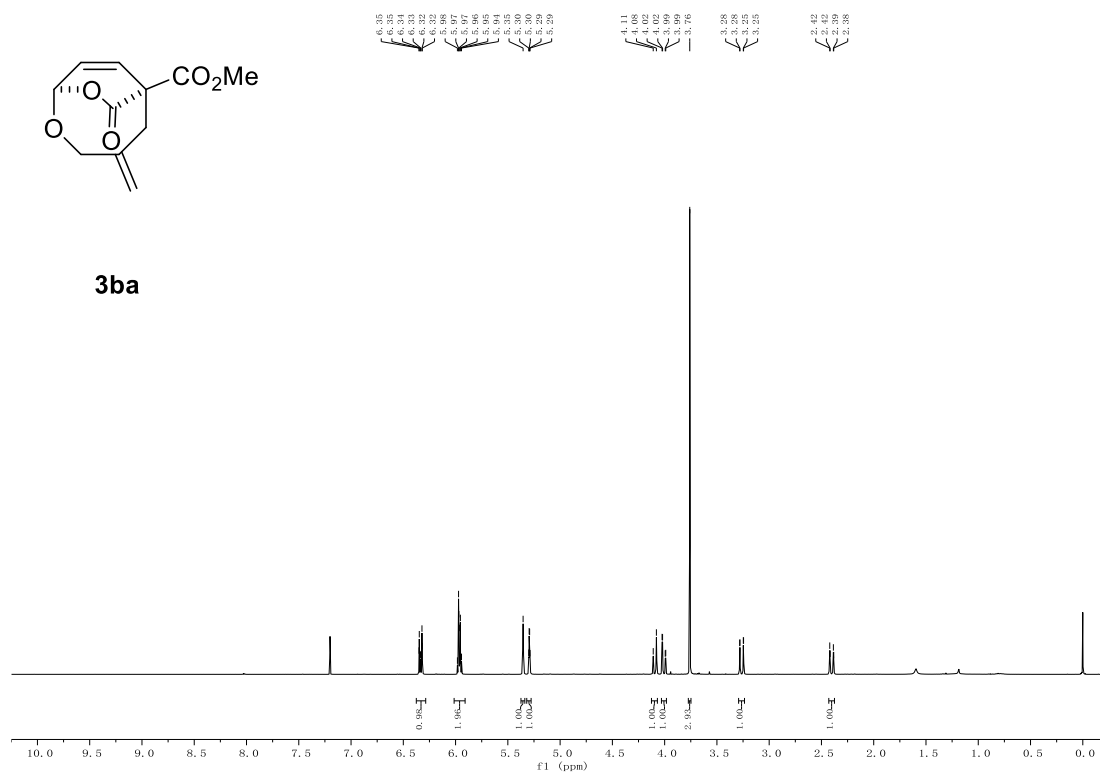

<sup>1</sup>H NMR of 3ba (400 MHz, CDCl<sub>3</sub>)

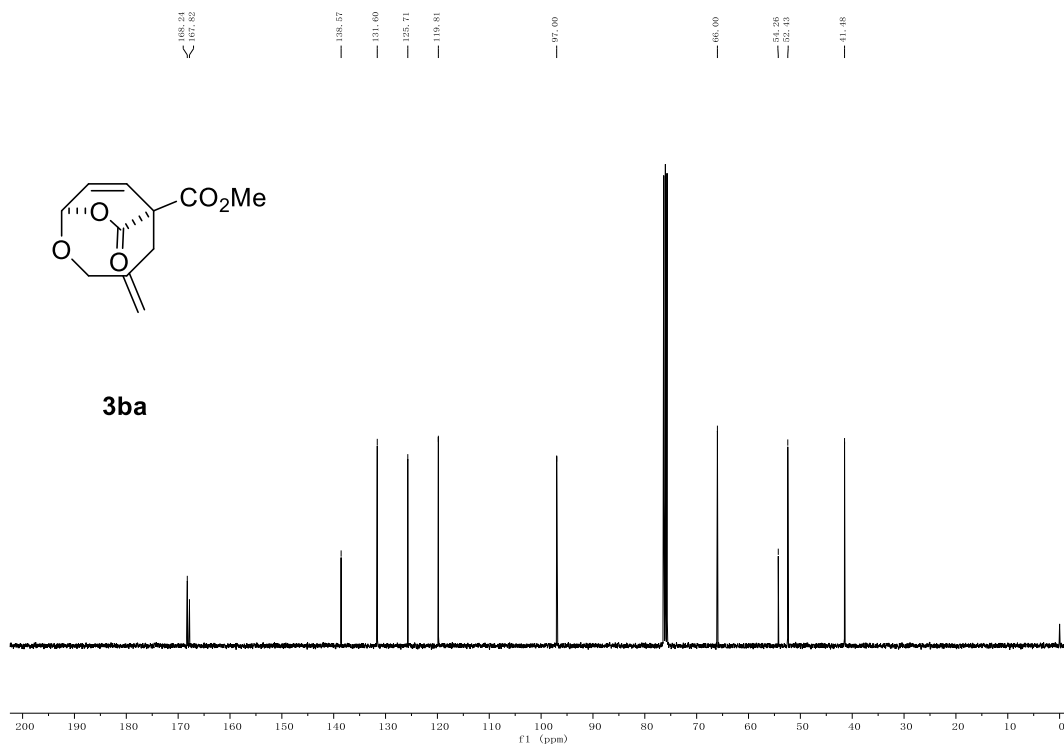

<sup>13</sup>C NMR of 3ba (101 MHz, CDCl<sub>3</sub>)

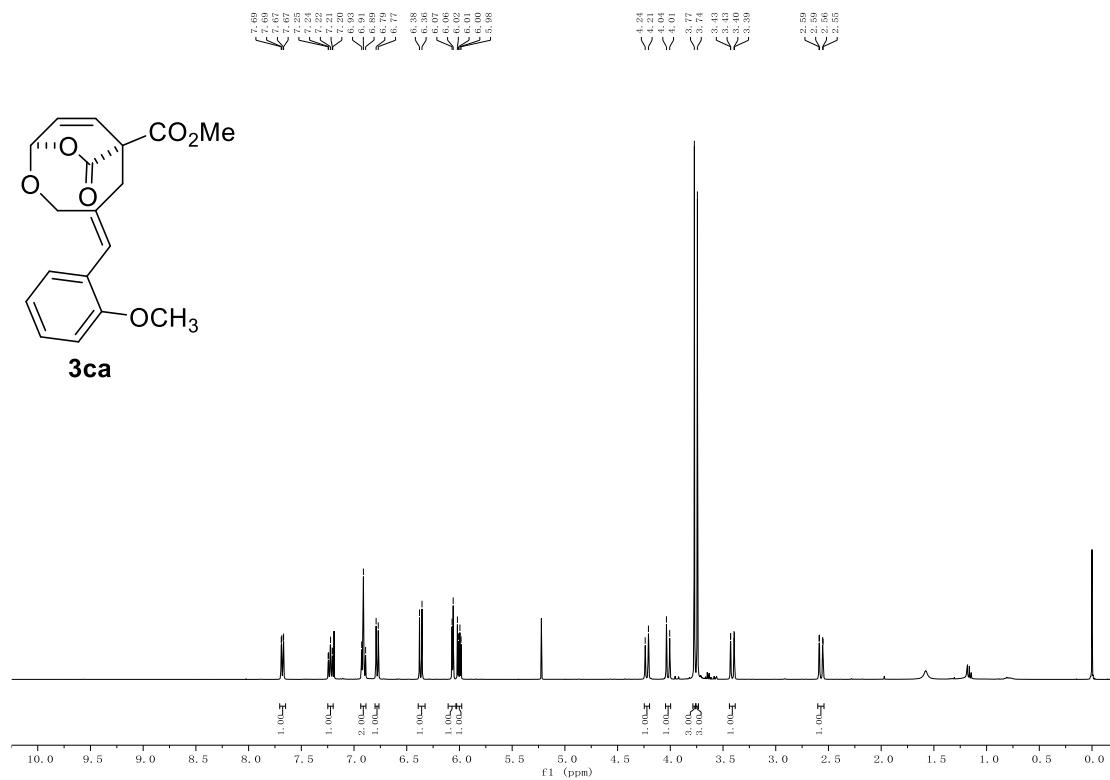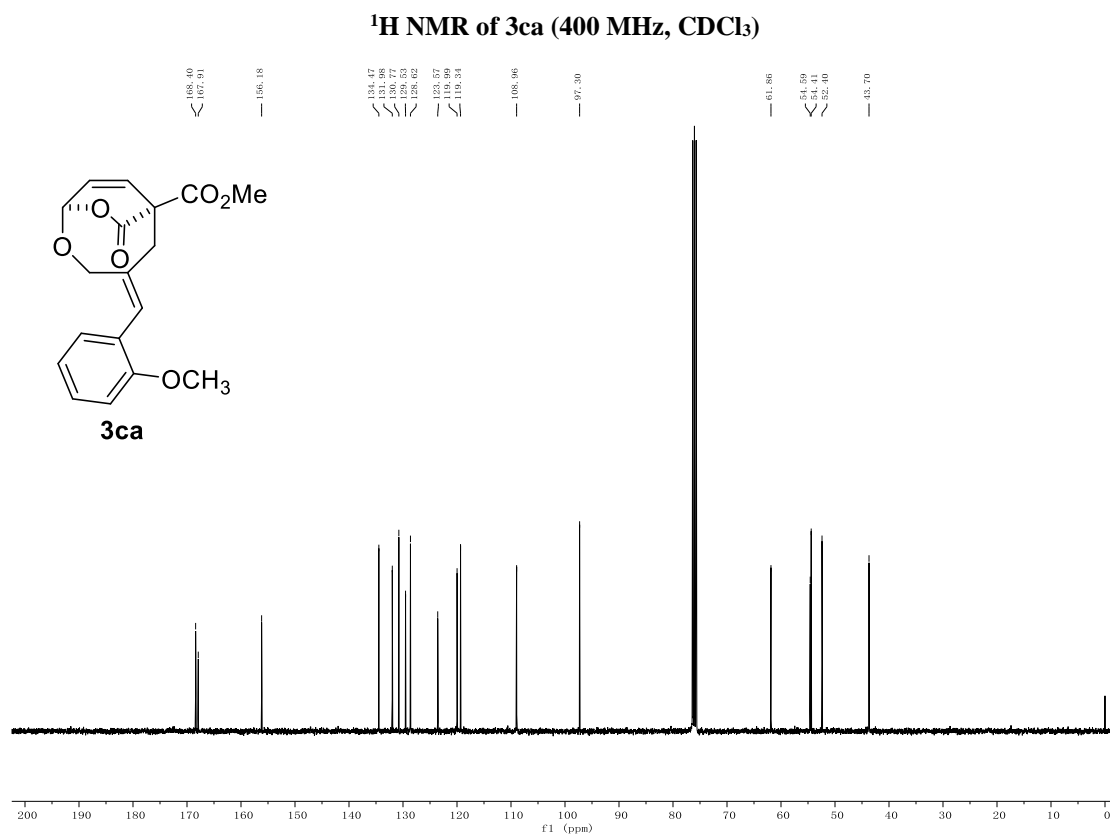

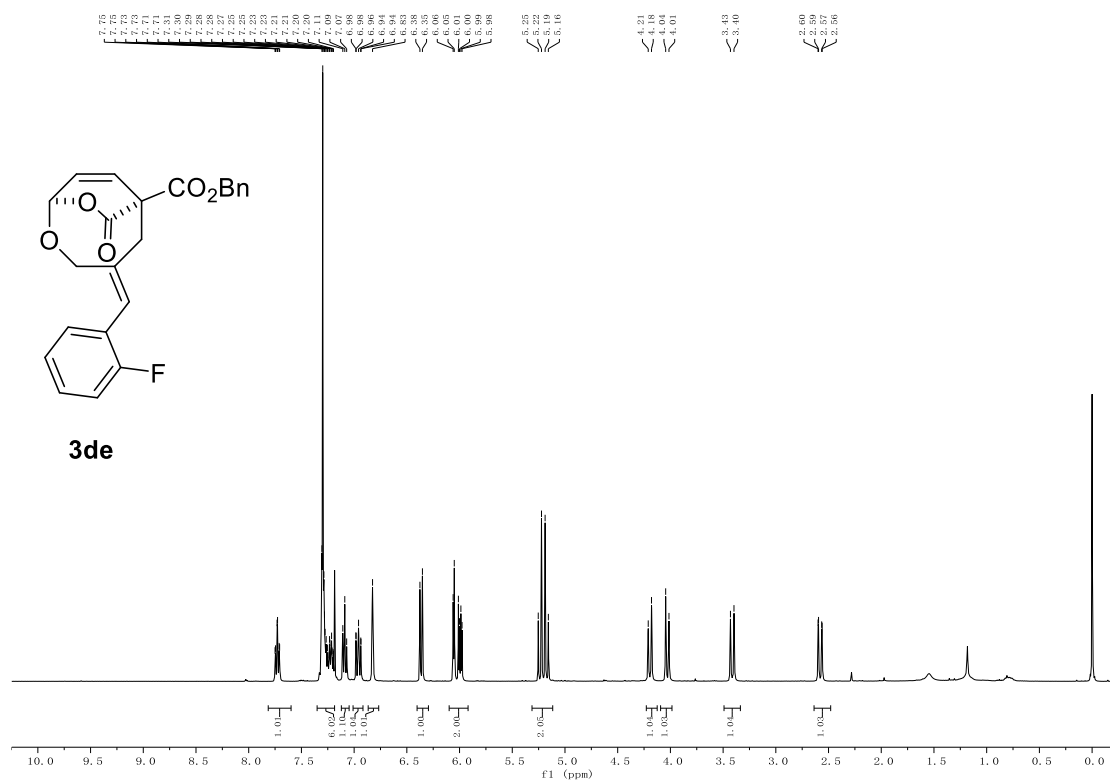

**<sup>1</sup>H NMR of 3de (400 MHz, CDCl<sub>3</sub>)**

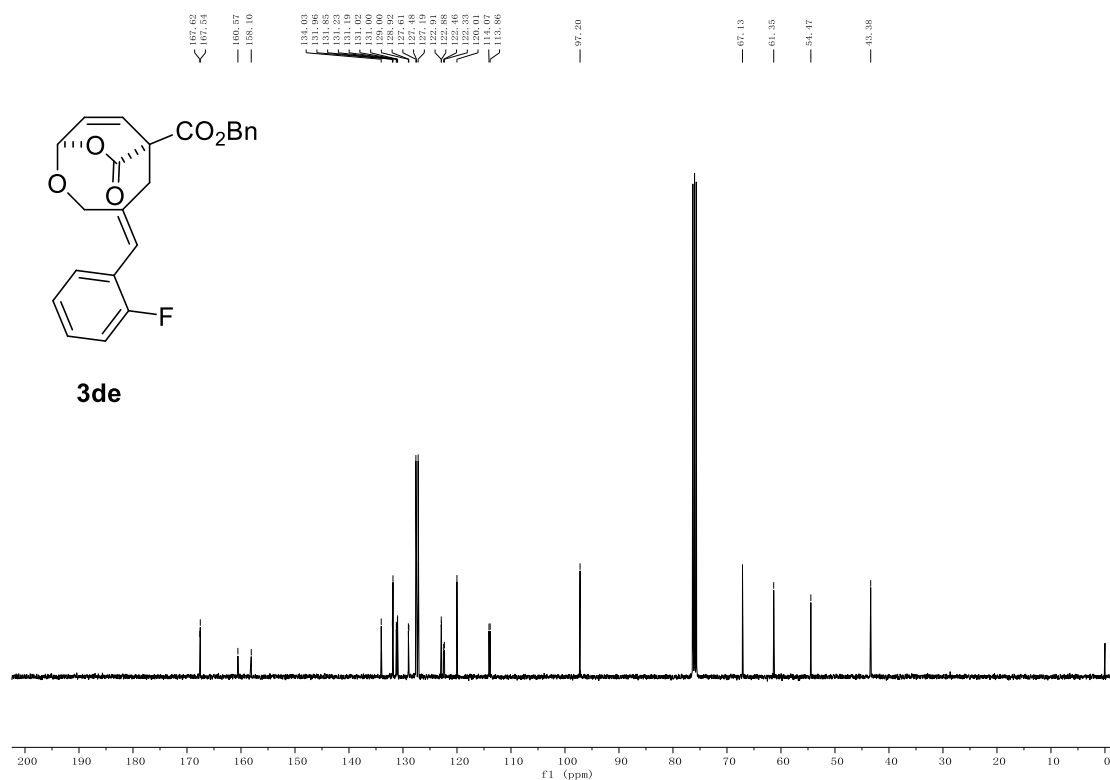

**<sup>13</sup>C NMR of 3de (101 MHz, CDCl<sub>3</sub>)**

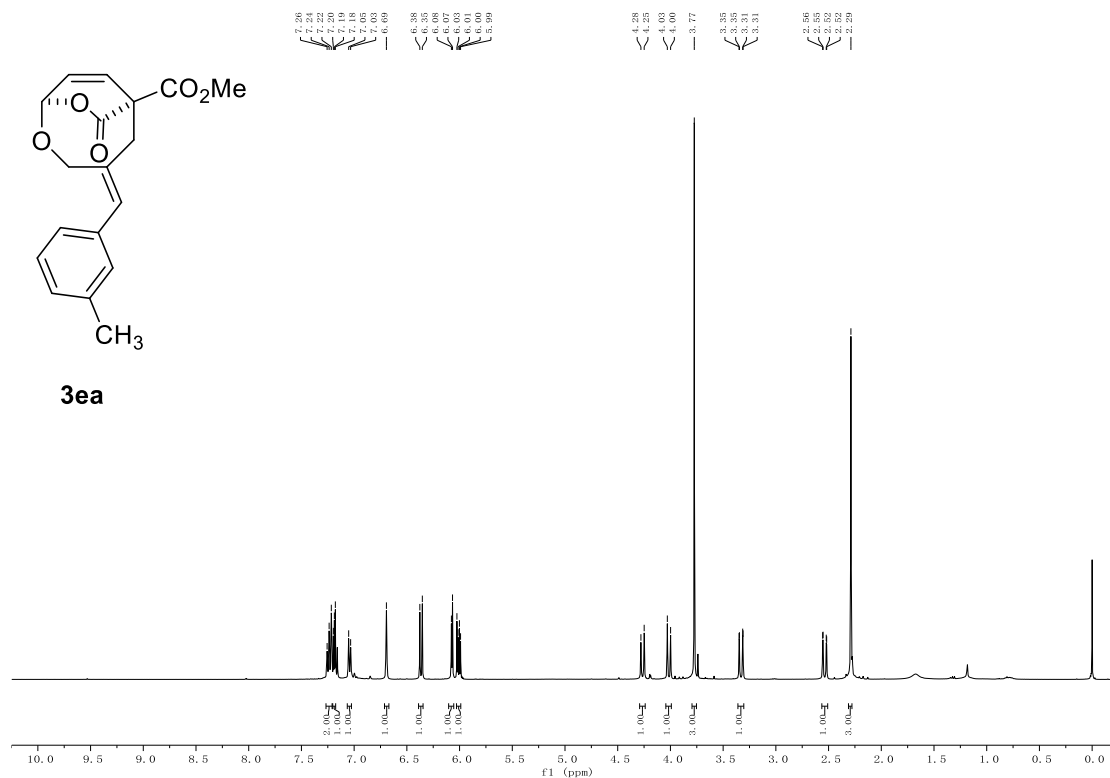

<sup>1</sup>H NMR of 3ea (400 MHz, CDCl<sub>3</sub>)

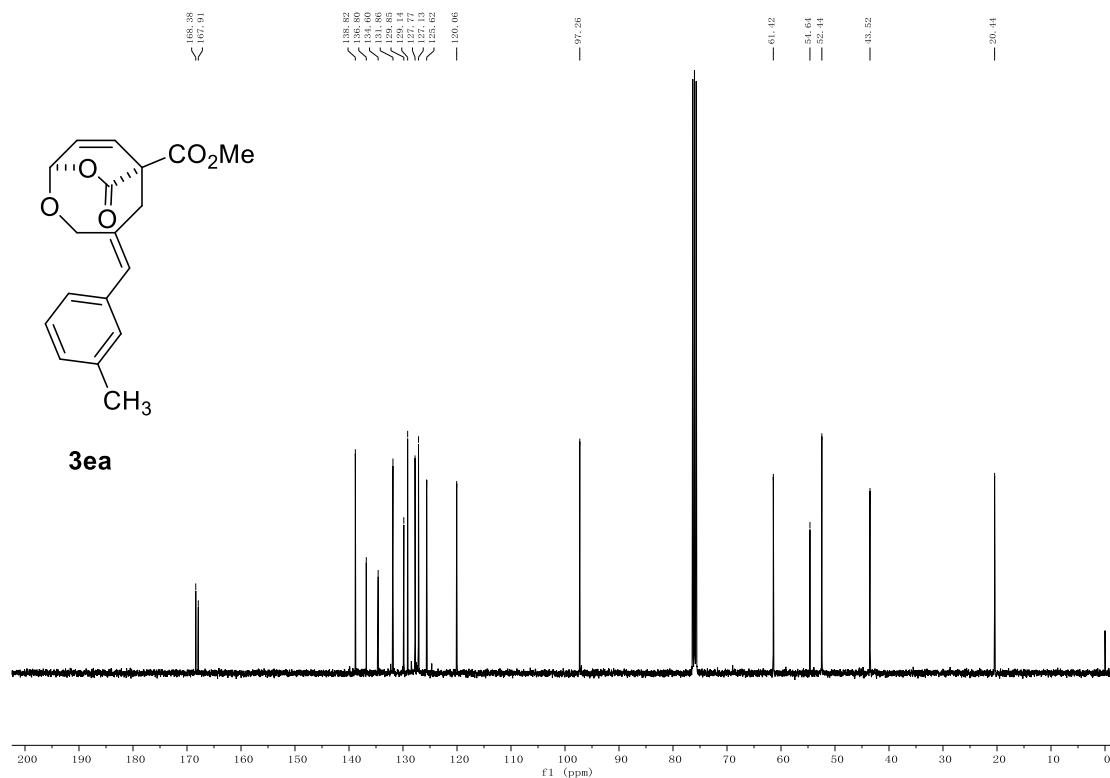

<sup>13</sup>C NMR of 3ea (101 MHz, CDCl<sub>3</sub>)

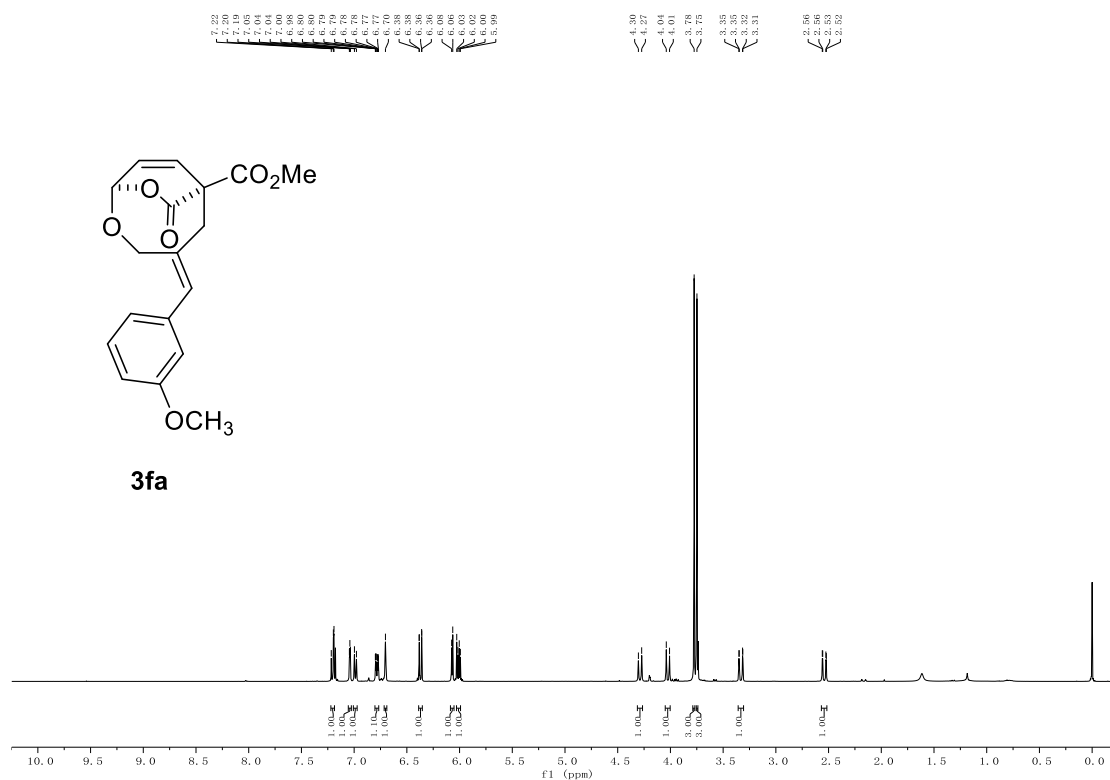

<sup>1</sup>H NMR of 3fa (400 MHz, CDCl<sub>3</sub>)

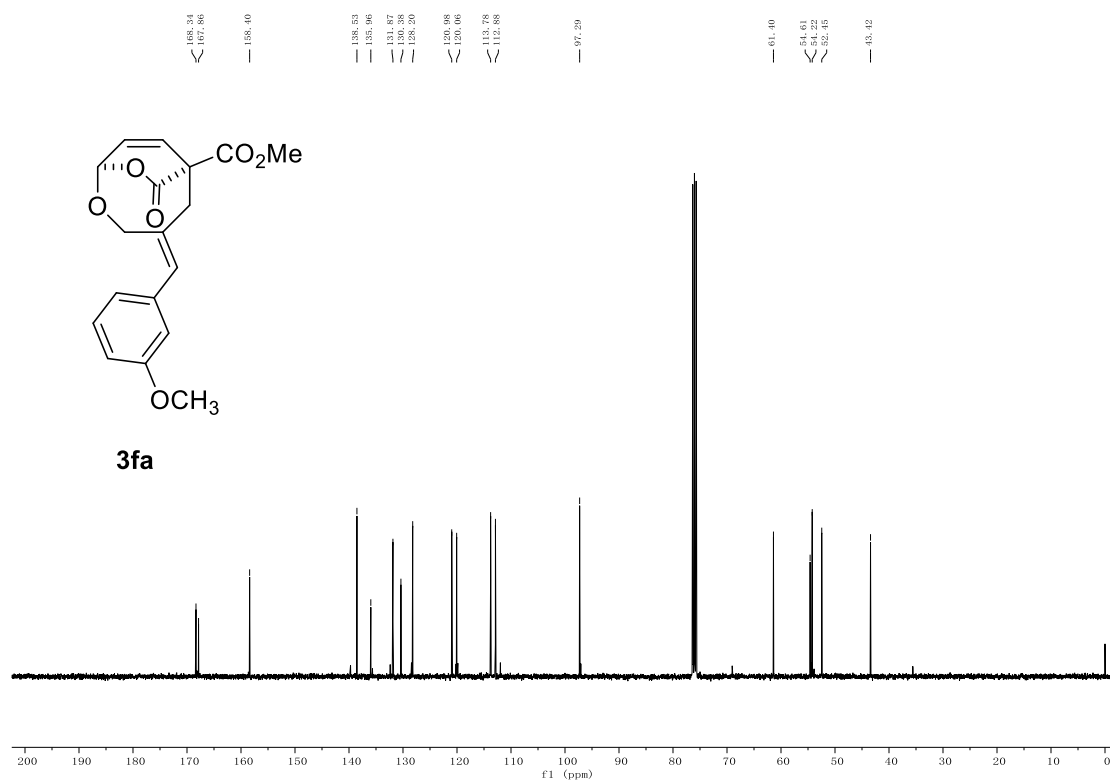

<sup>13</sup>C NMR of 3fa (101 MHz, CDCl<sub>3</sub>)

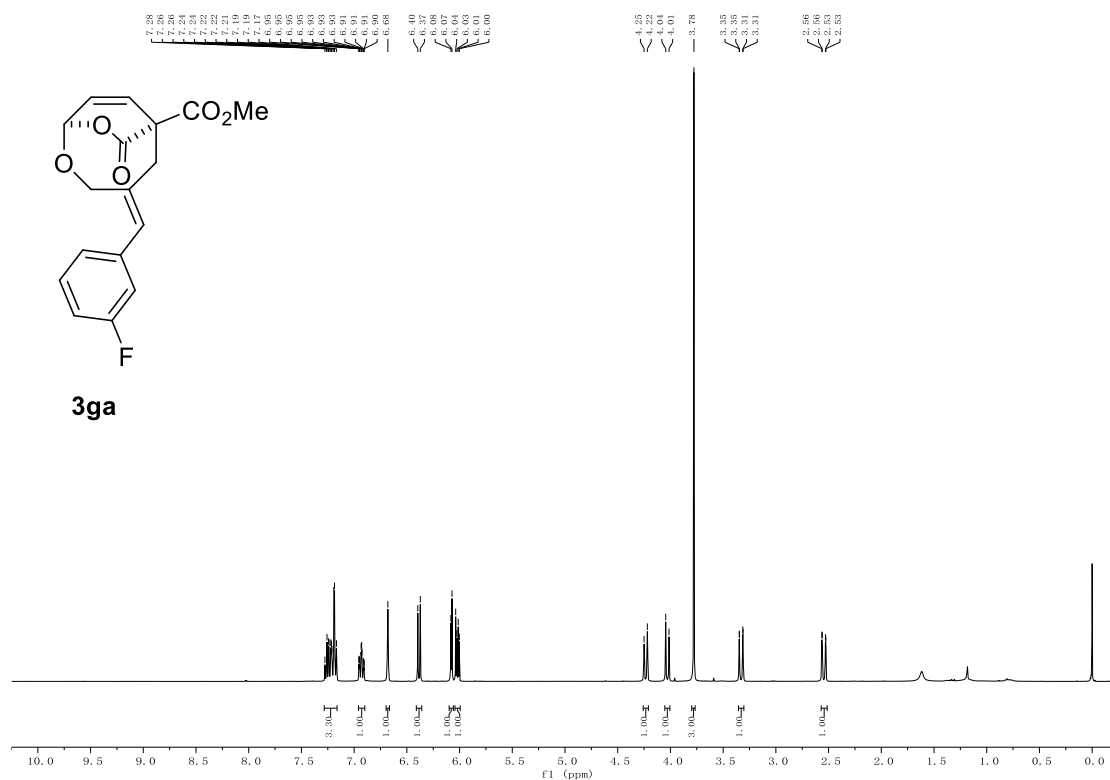

<sup>1</sup>H NMR of 3ga (400 MHz, CDCl<sub>3</sub>)

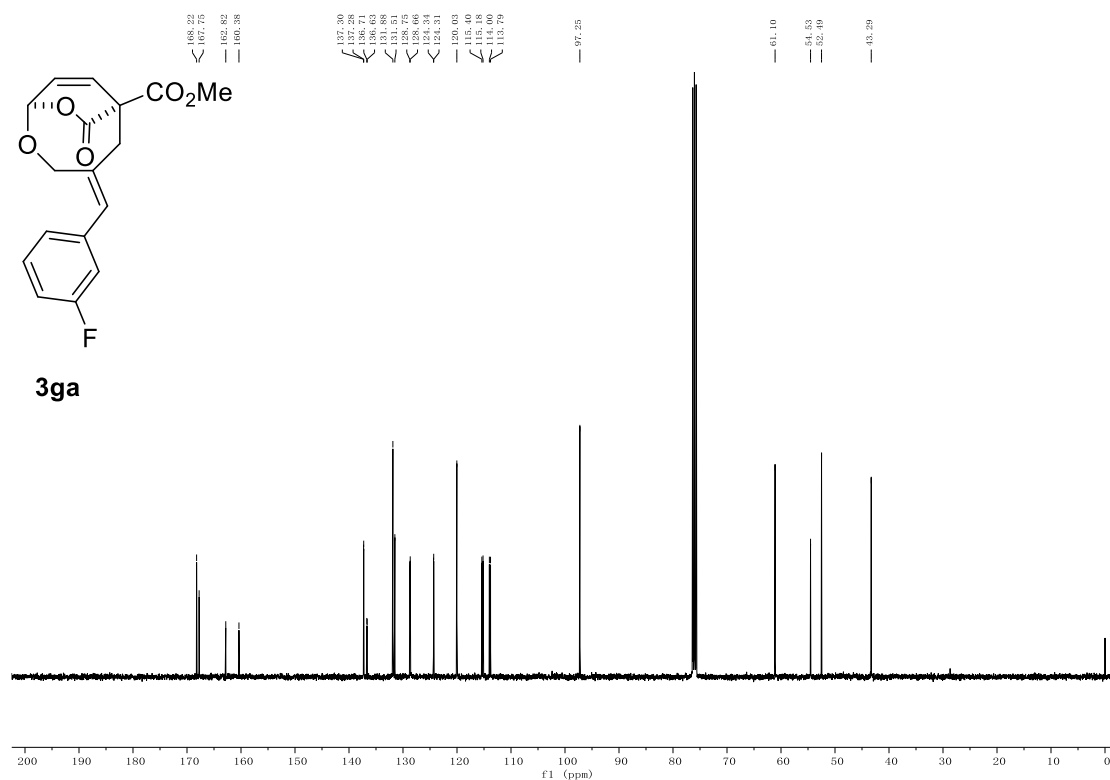

<sup>13</sup>C NMR of 3ga (101 MHz, CDCl<sub>3</sub>)

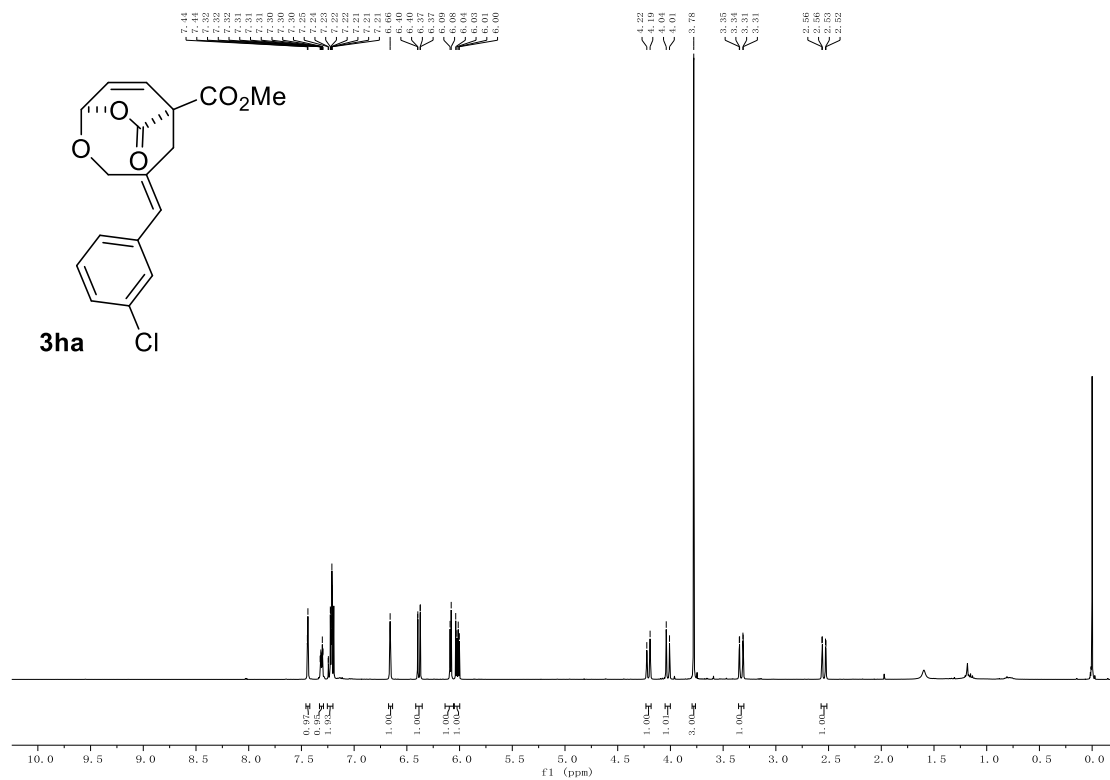

<sup>1</sup>H NMR of 3ha (400 MHz, CDCl<sub>3</sub>)

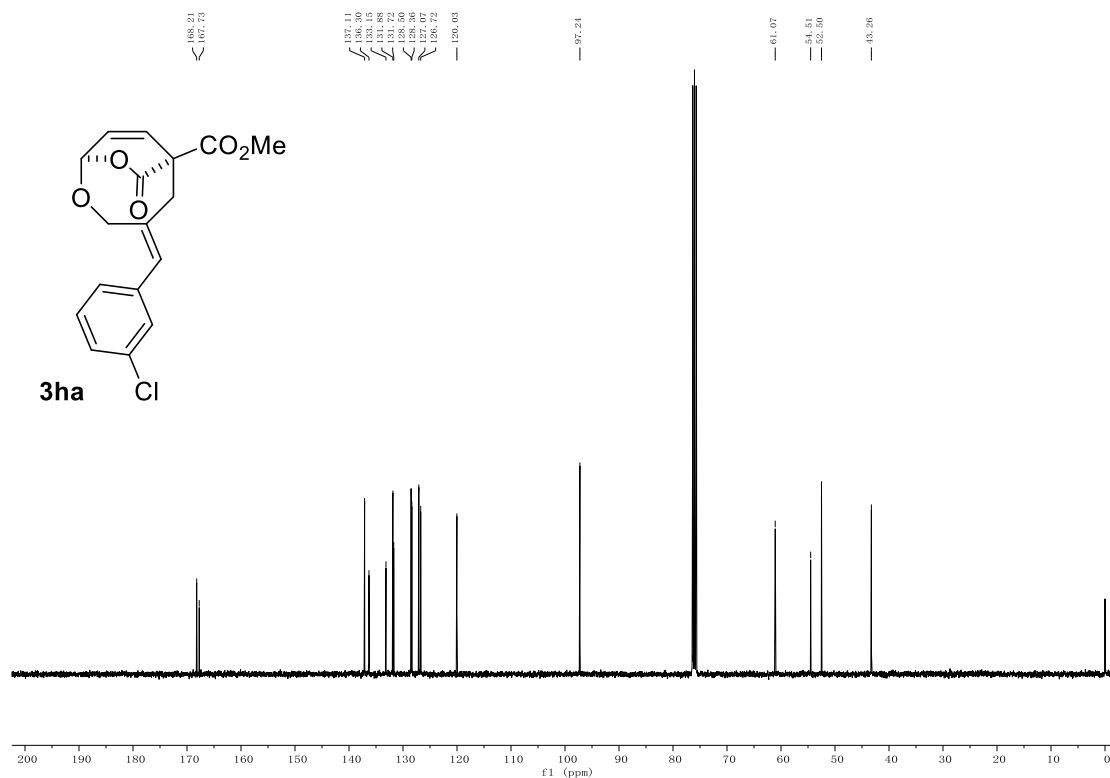

<sup>13</sup>C NMR of 3ha (101 MHz, CDCl<sub>3</sub>)

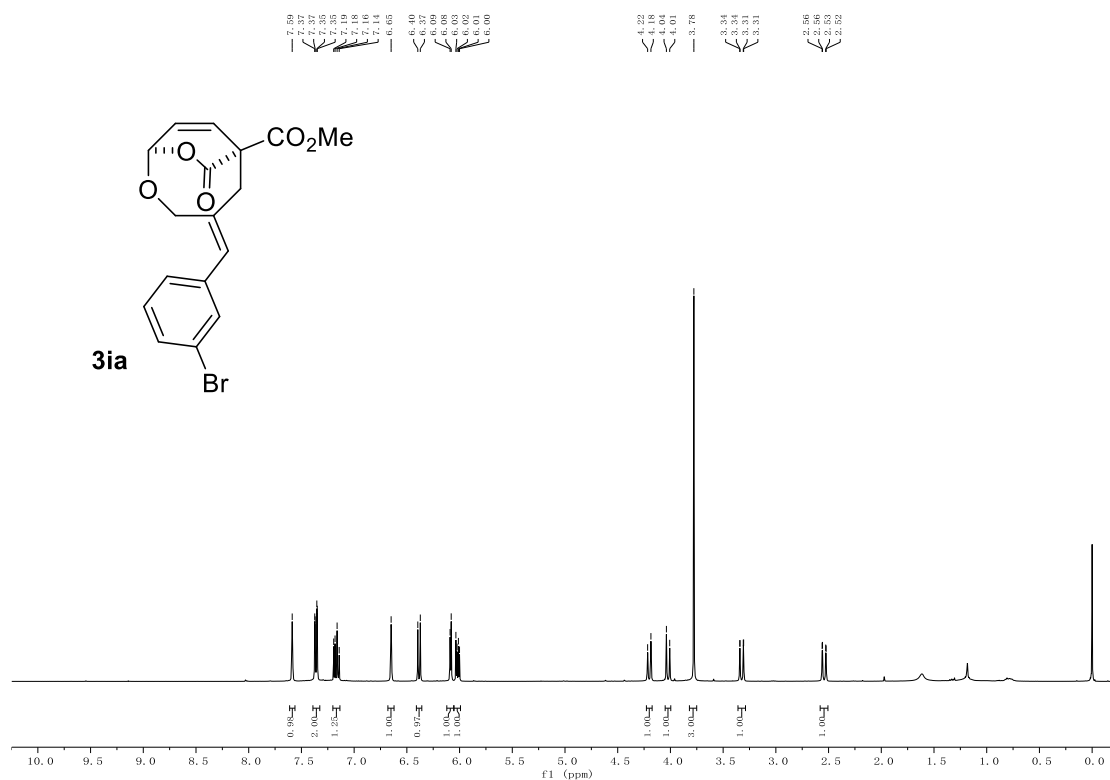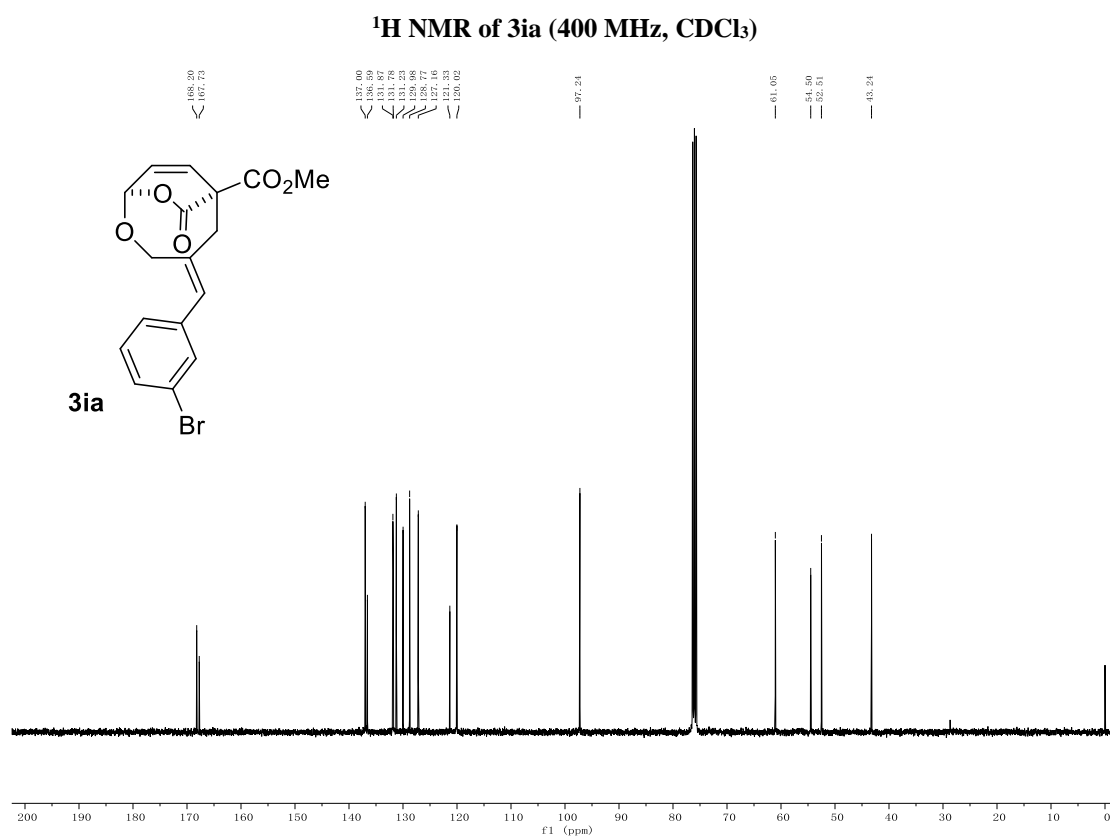





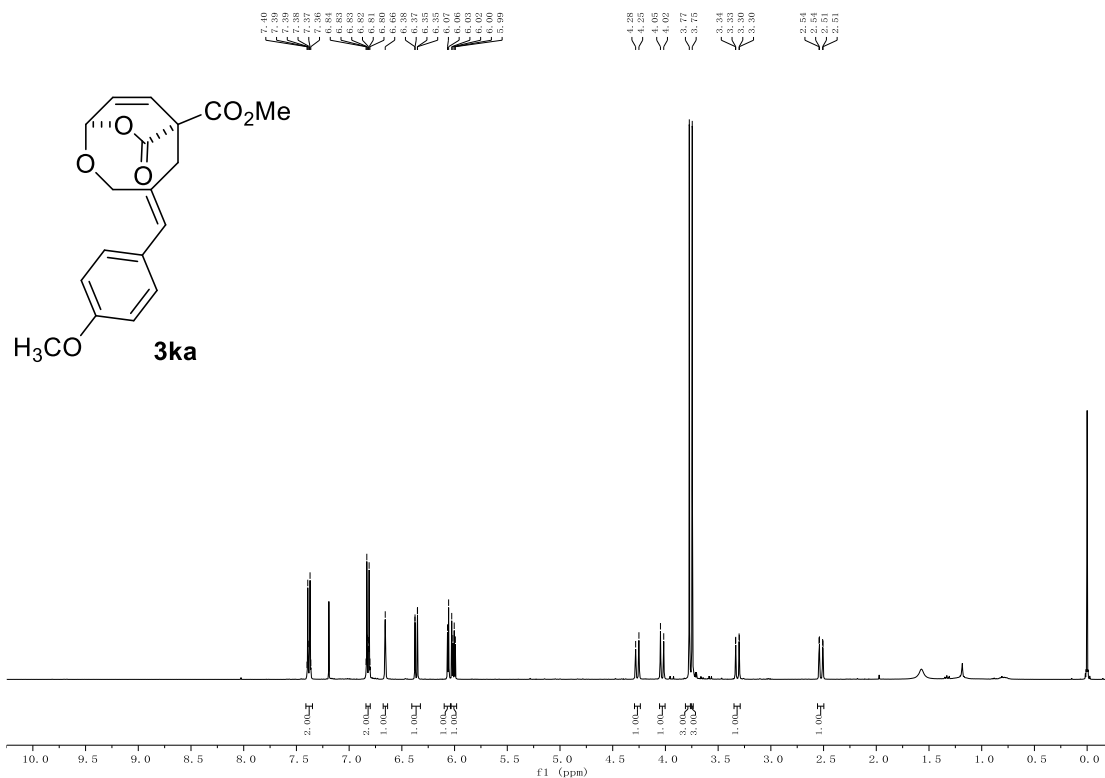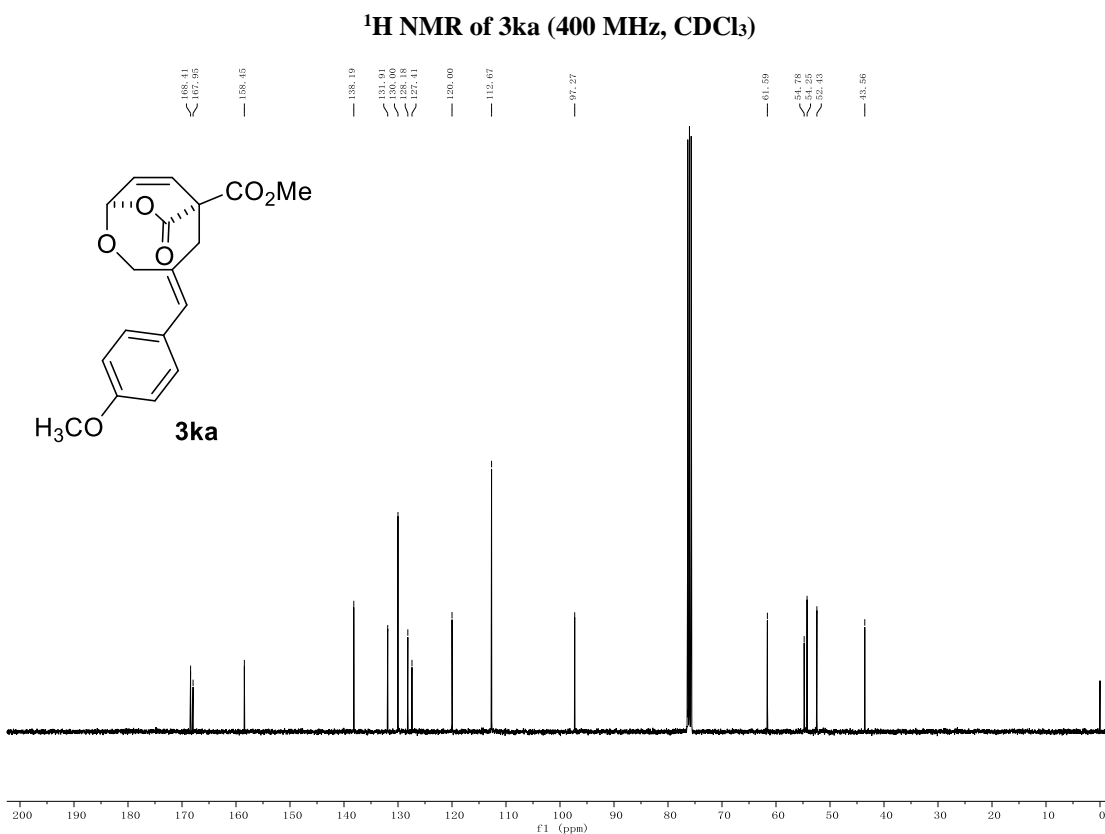

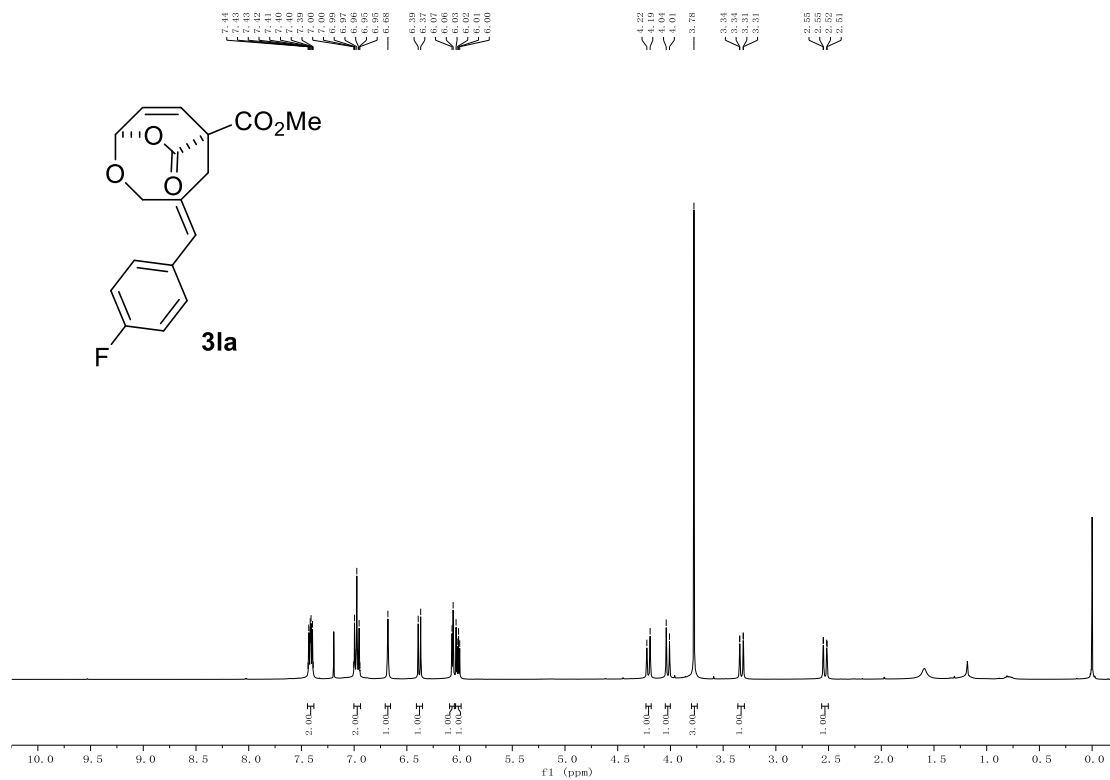

<sup>1</sup>H NMR of 3la (400 MHz, CDCl<sub>3</sub>)

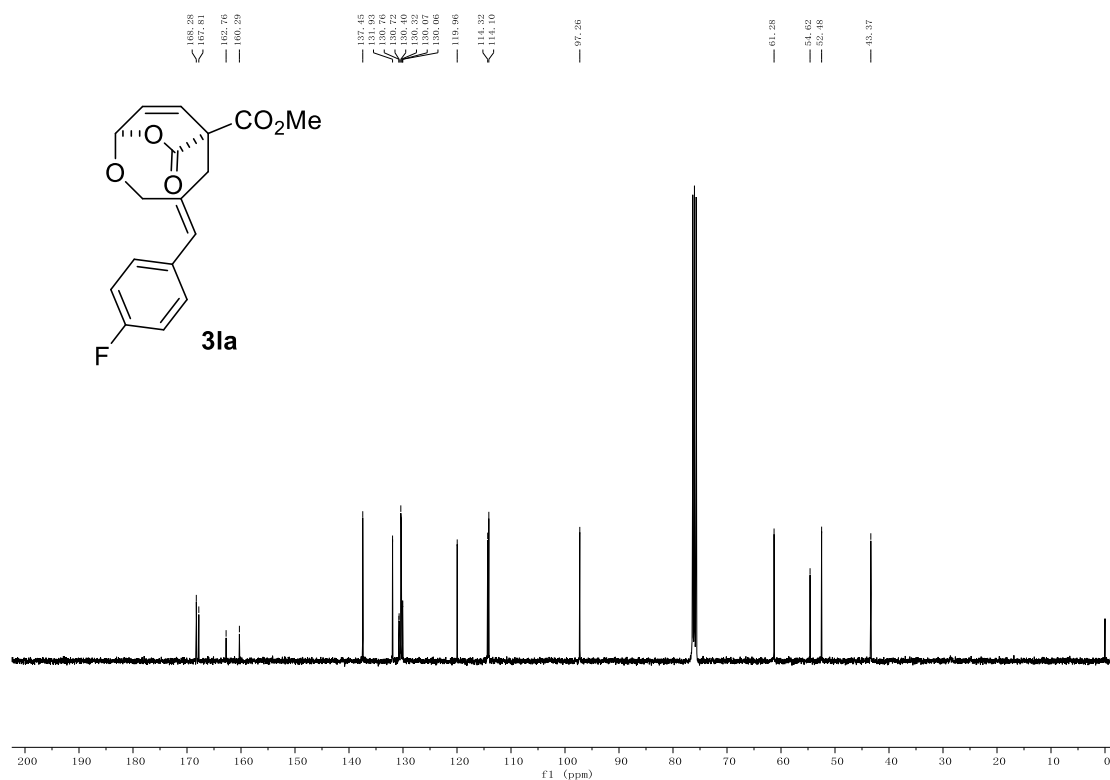

<sup>13</sup>C NMR of 3la (101 MHz, CDCl<sub>3</sub>)

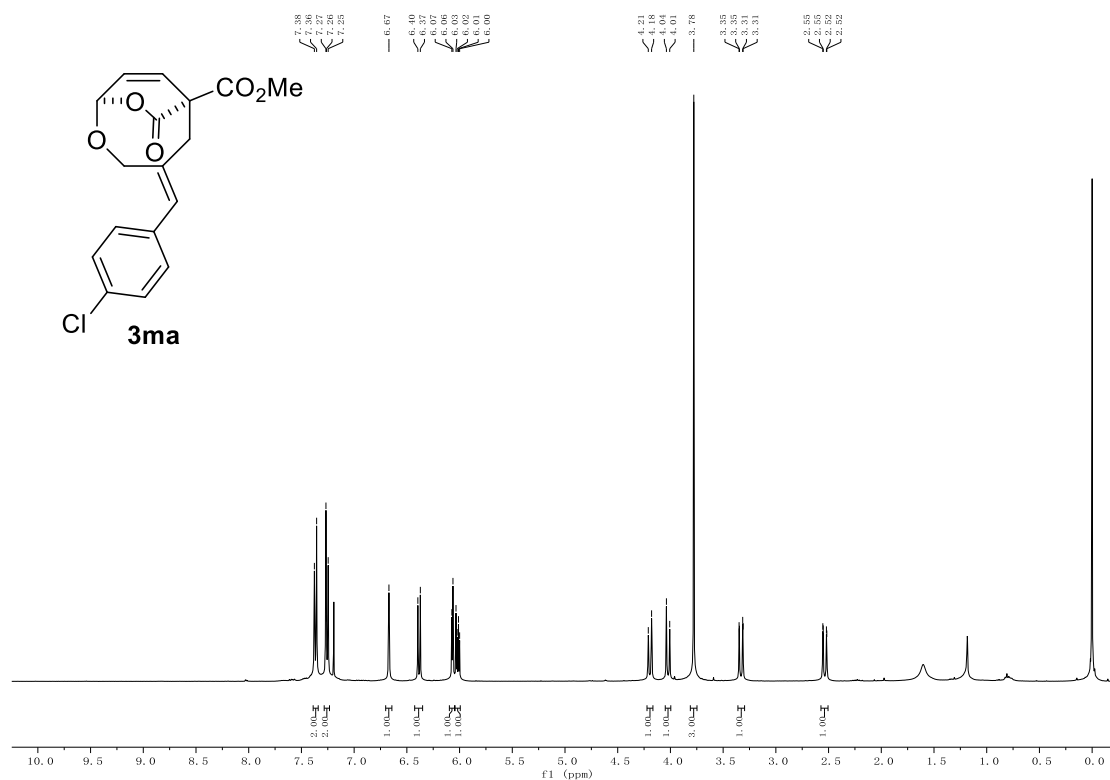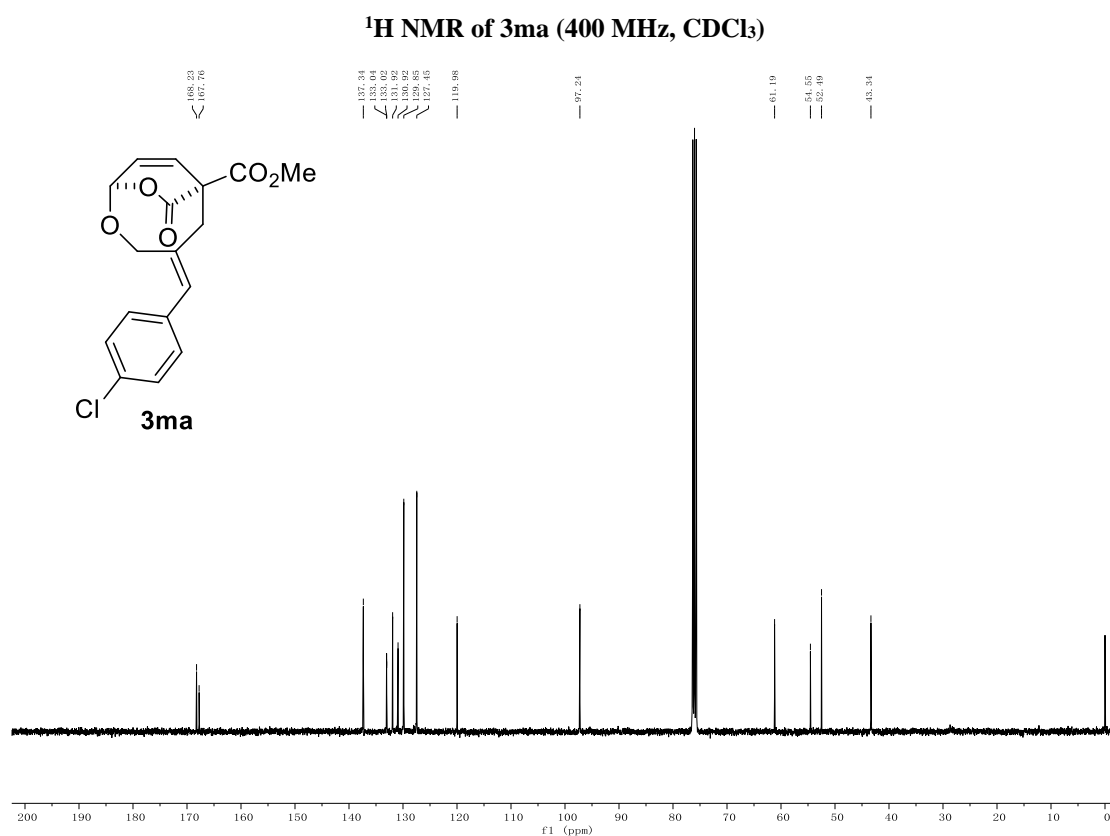

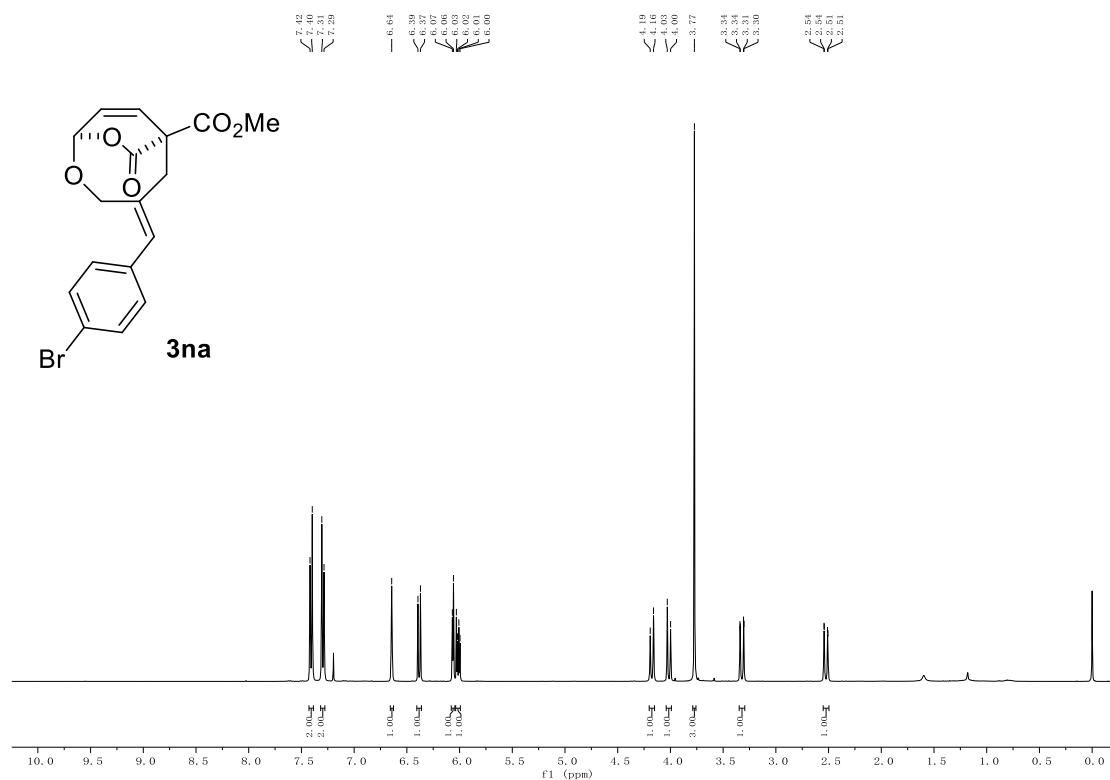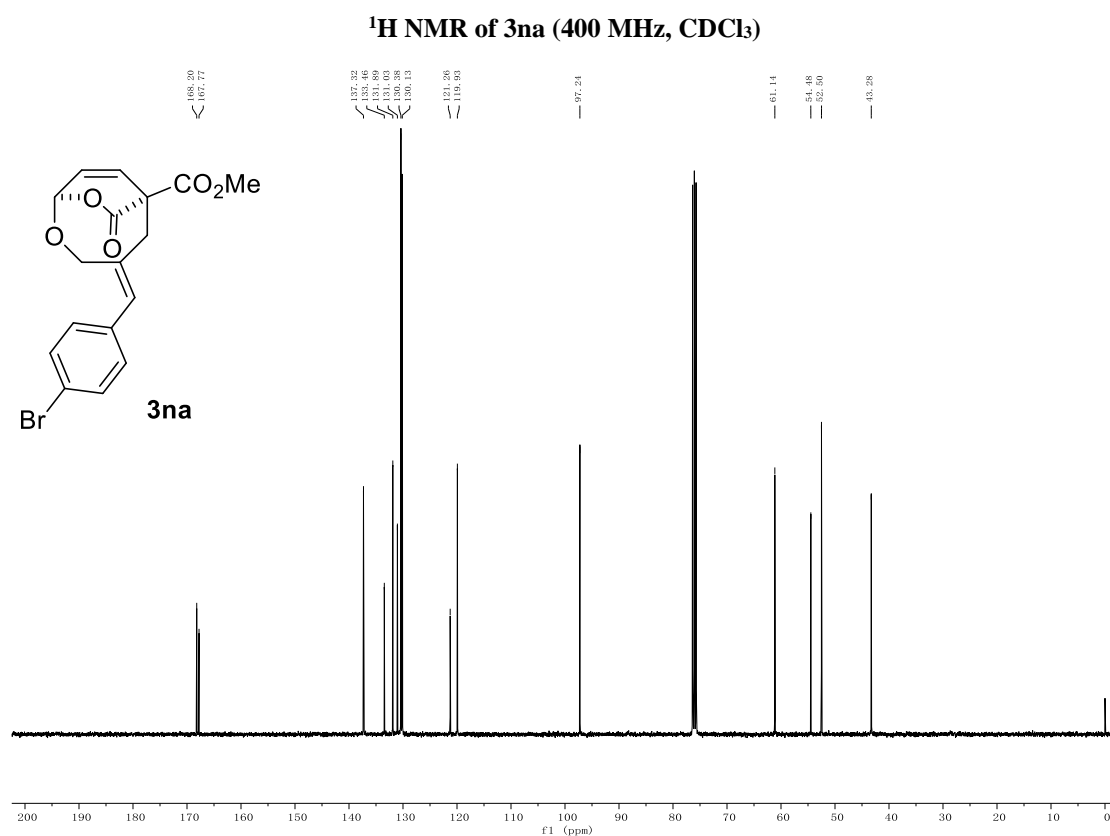

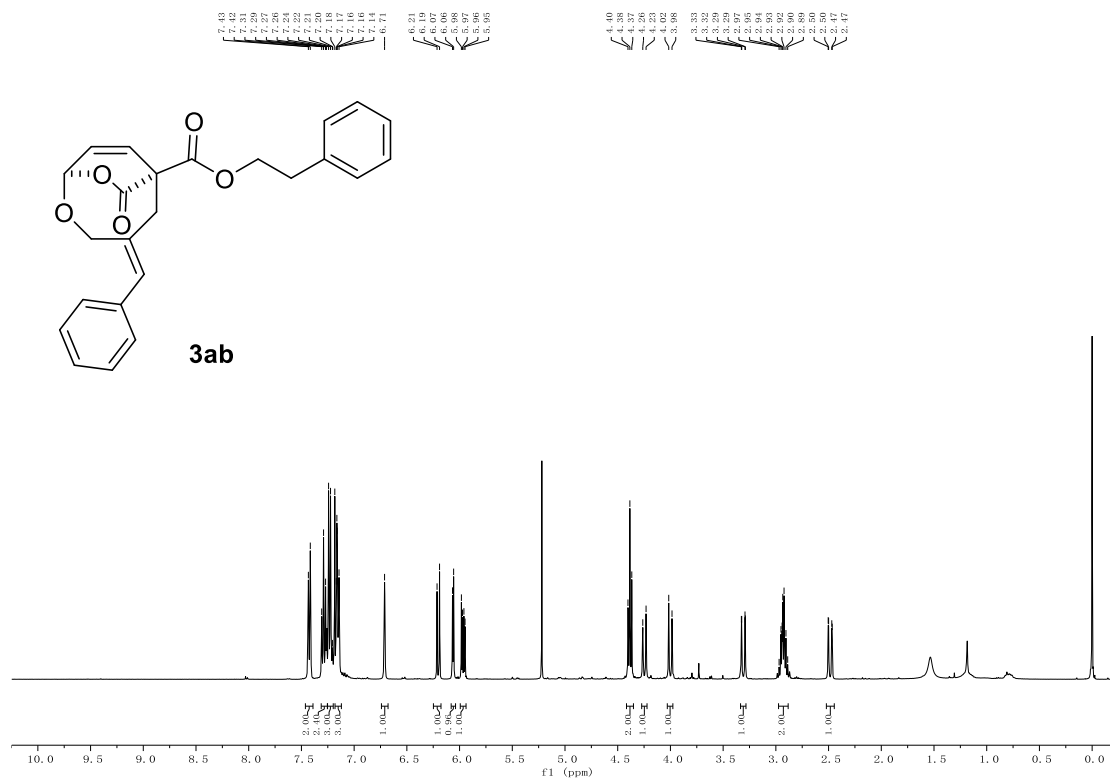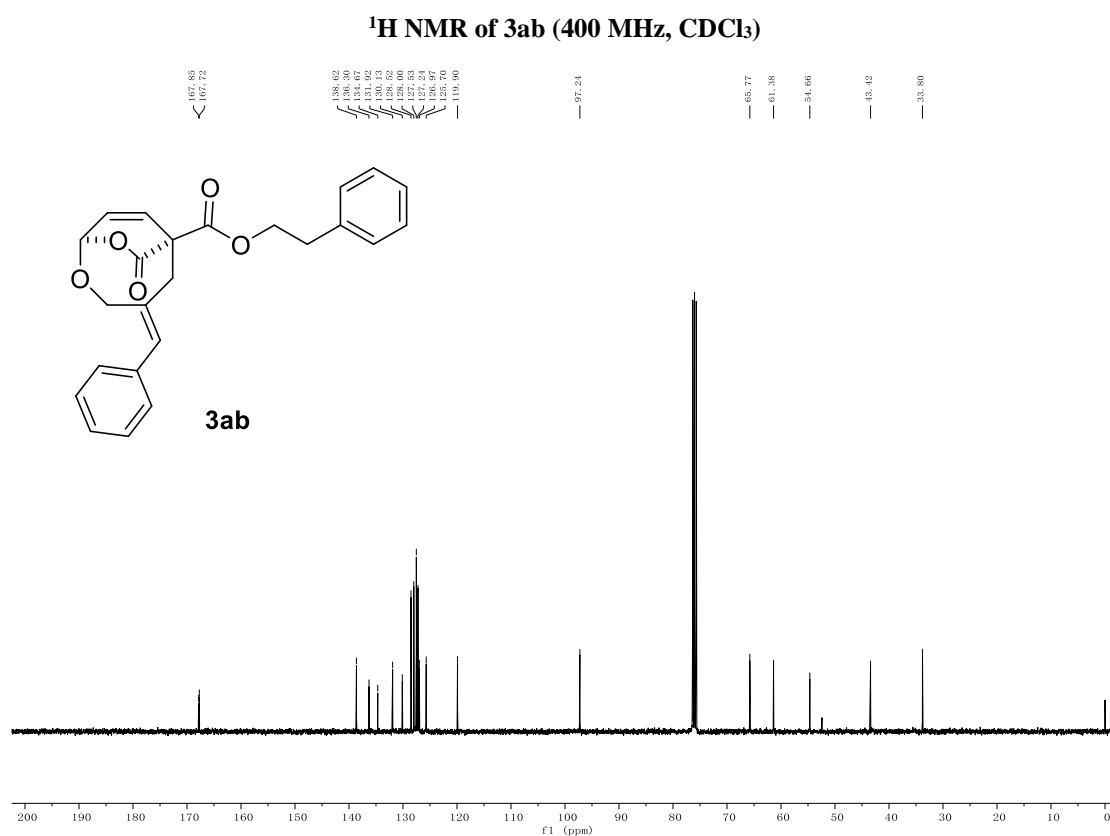

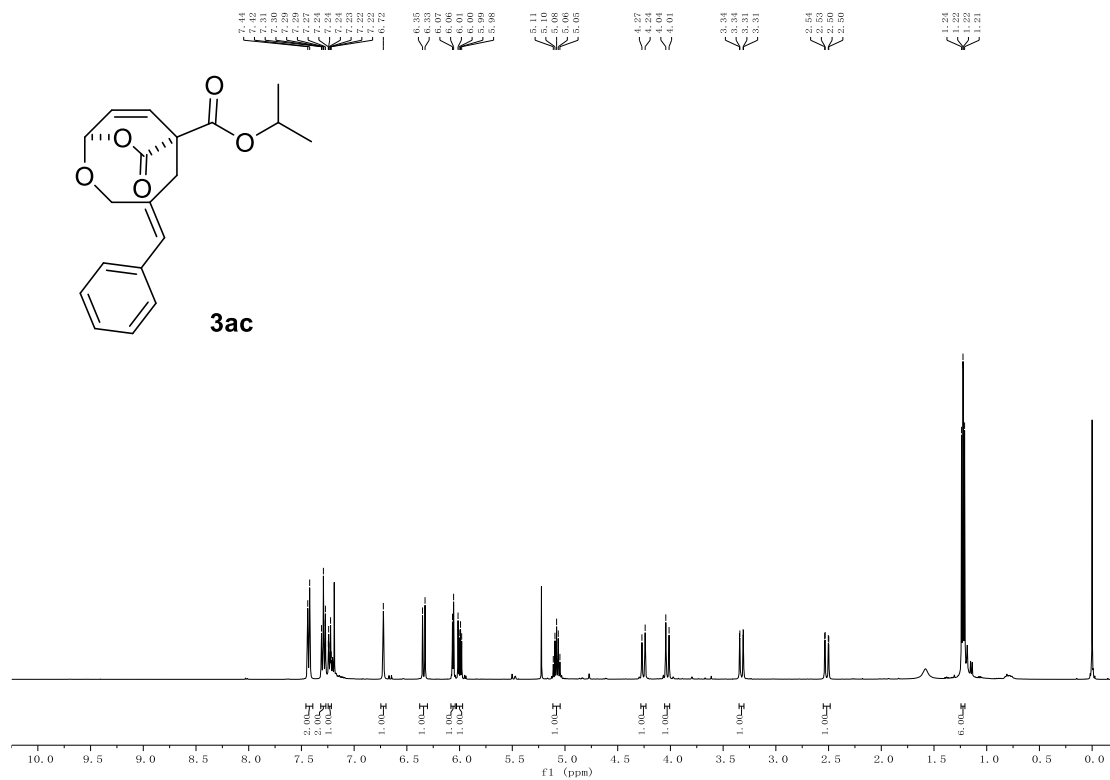

**<sup>1</sup>H NMR of 3ac (400 MHz, CDCl<sub>3</sub>)**

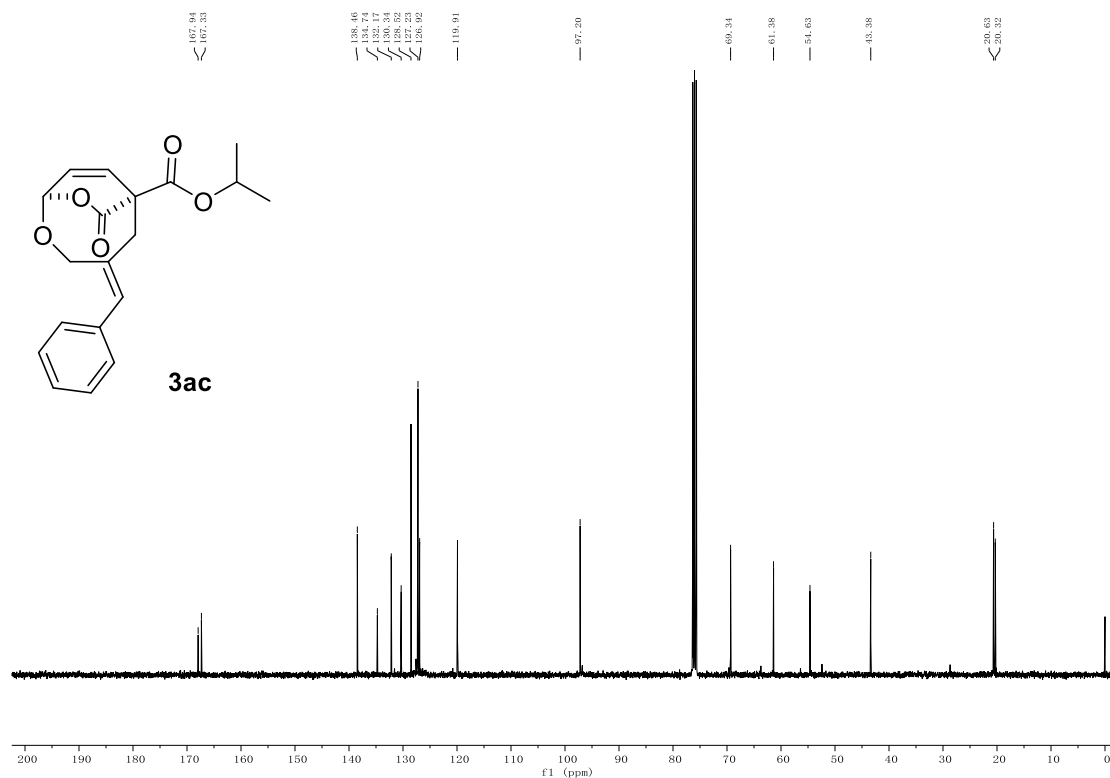

**<sup>13</sup>C NMR of 3ac (101 MHz, CDCl<sub>3</sub>)**

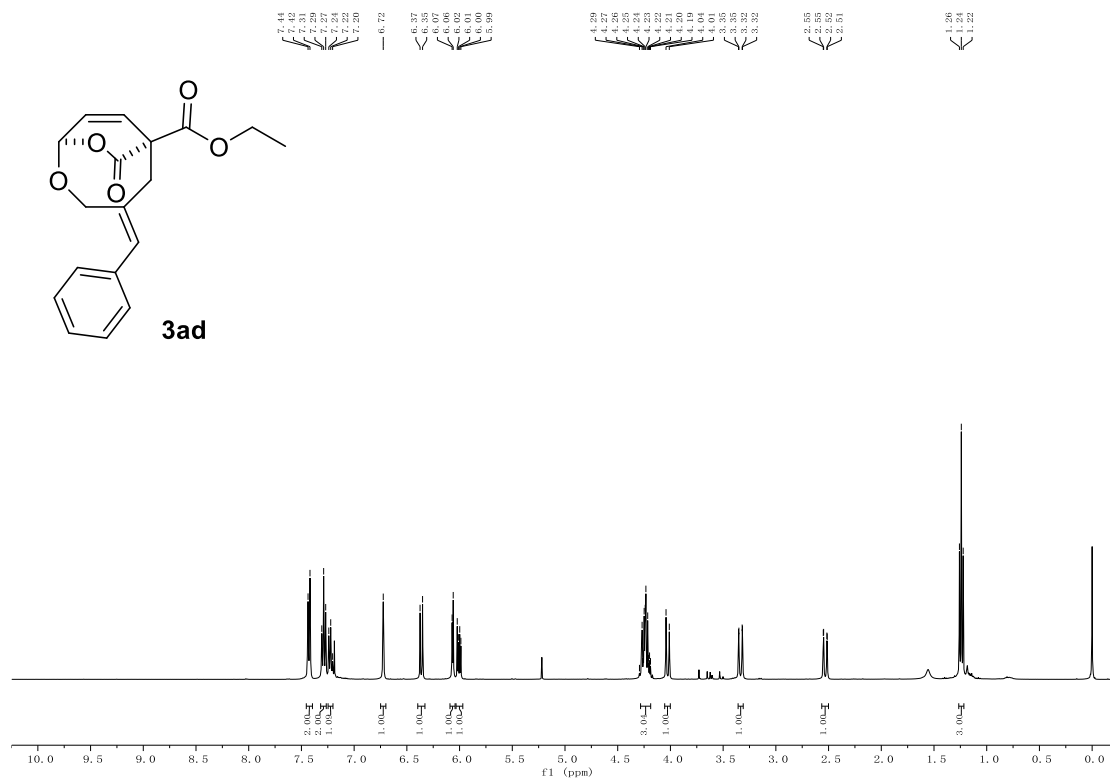

**<sup>1</sup>H NMR of 3ad (400 MHz, CDCl<sub>3</sub>)**

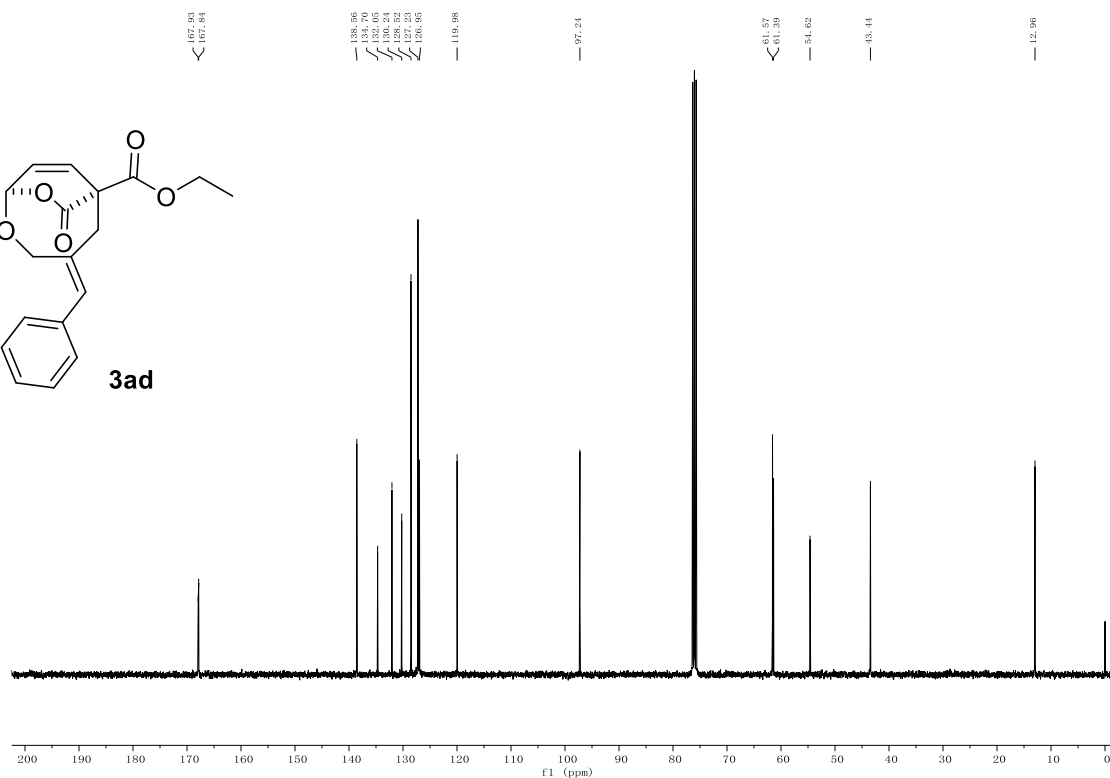

**<sup>13</sup>C NMR of 3ad (101 MHz, CDCl<sub>3</sub>)**



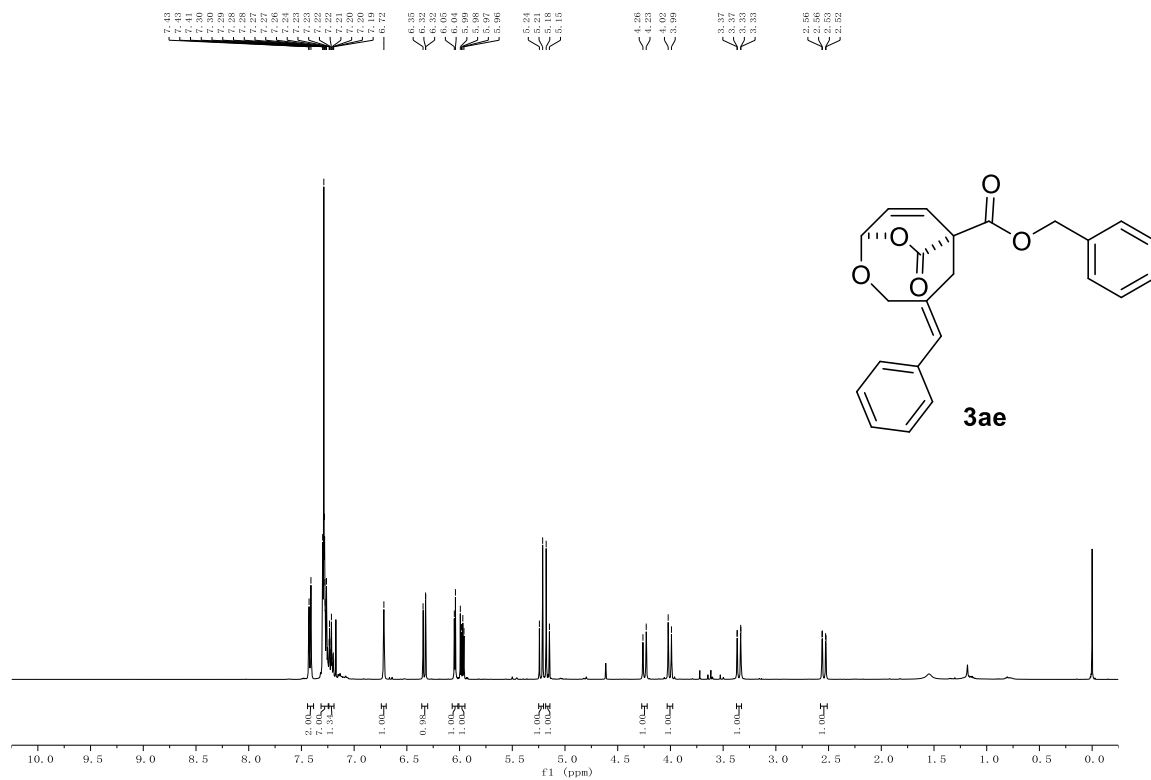

<sup>1</sup>H NMR of **3ae** (400 MHz, CDCl<sub>3</sub>)

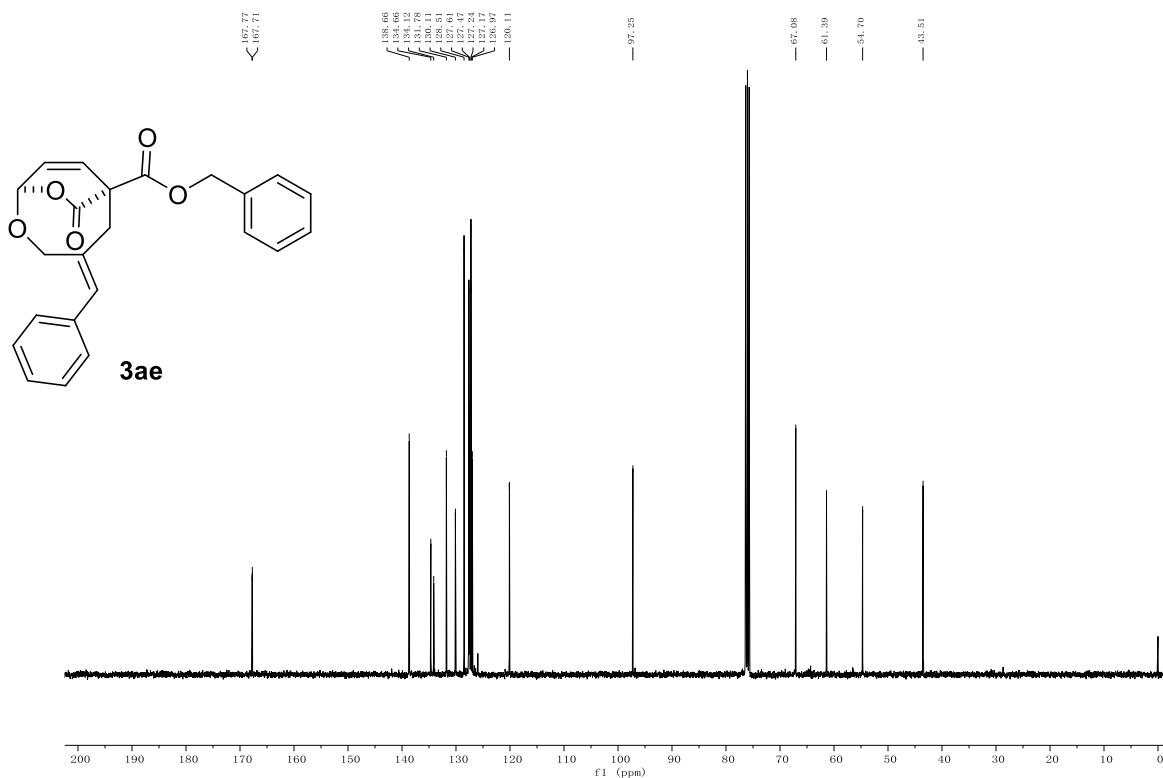

<sup>13</sup>C NMR of **3ae** (101 MHz, CDCl<sub>3</sub>)

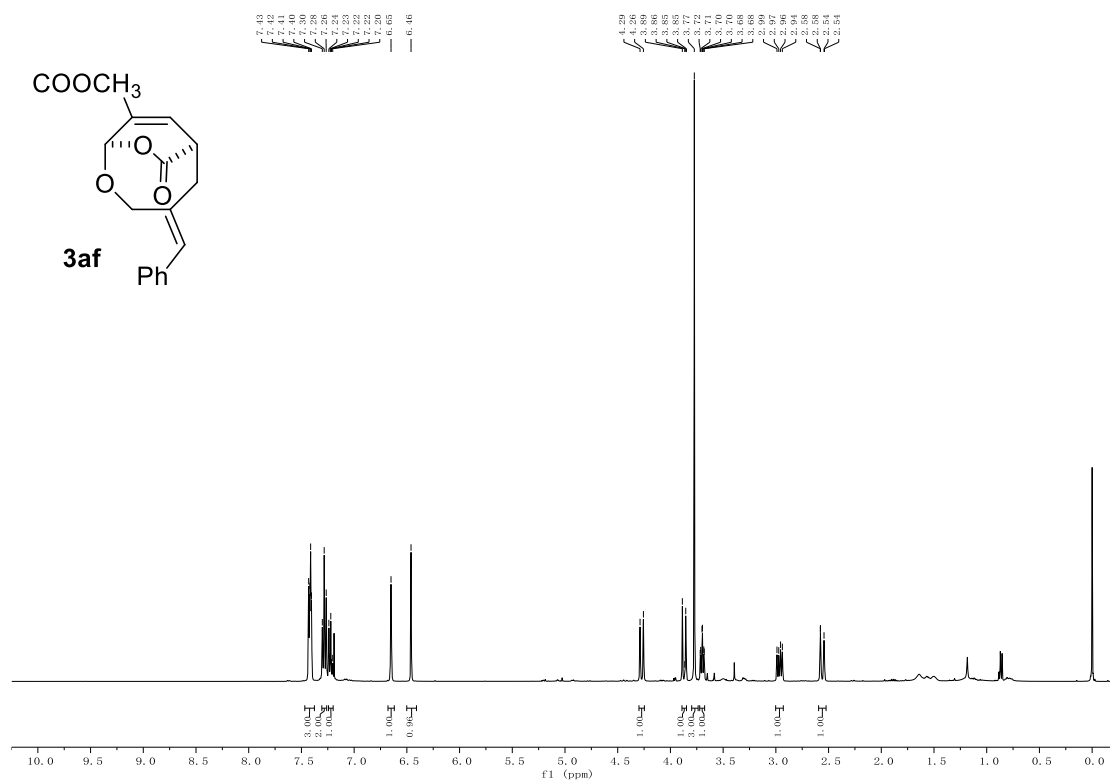

<sup>1</sup>H NMR of 3af (400 MHz, CDCl<sub>3</sub>)

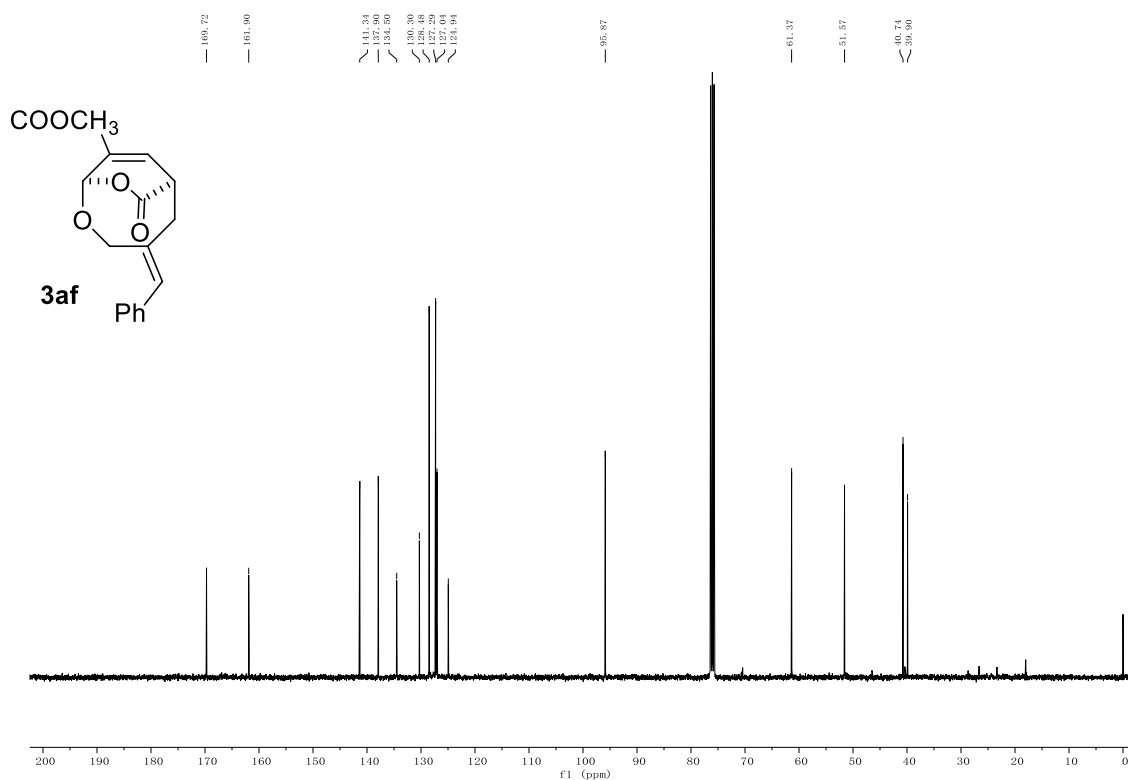

<sup>13</sup>C NMR of 3af (101 MHz, CDCl<sub>3</sub>)

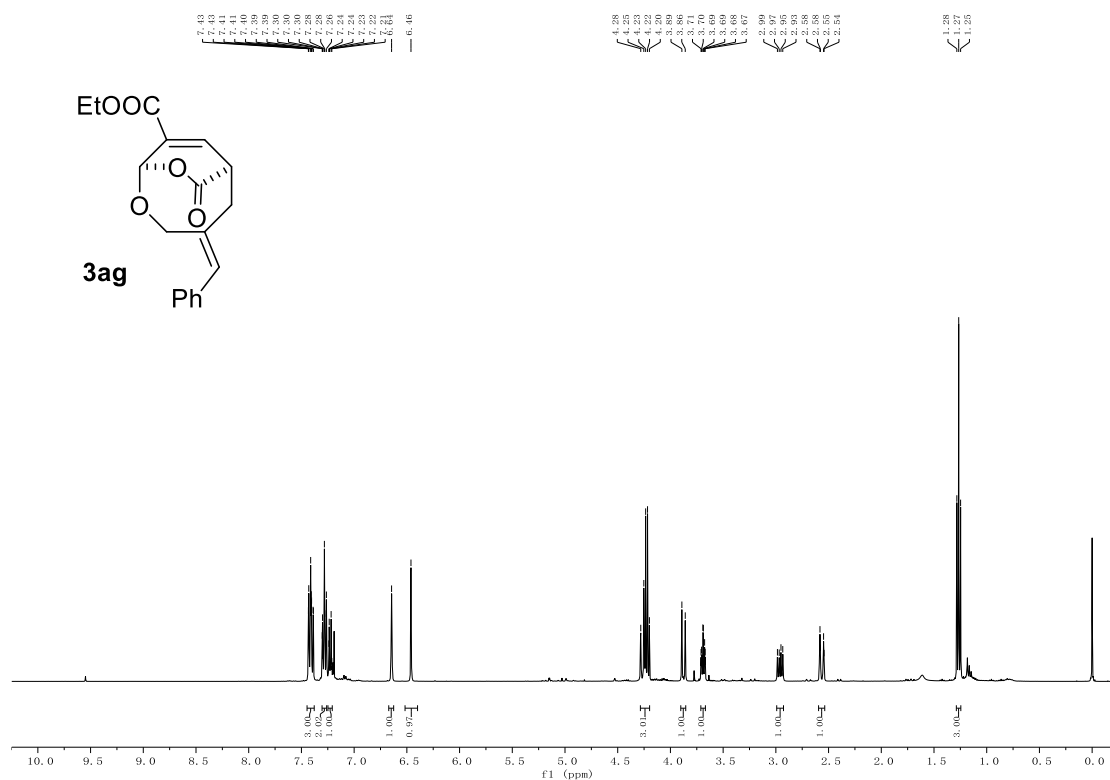

<sup>1</sup>H NMR of **3ag** (400 MHz, CDCl<sub>3</sub>)

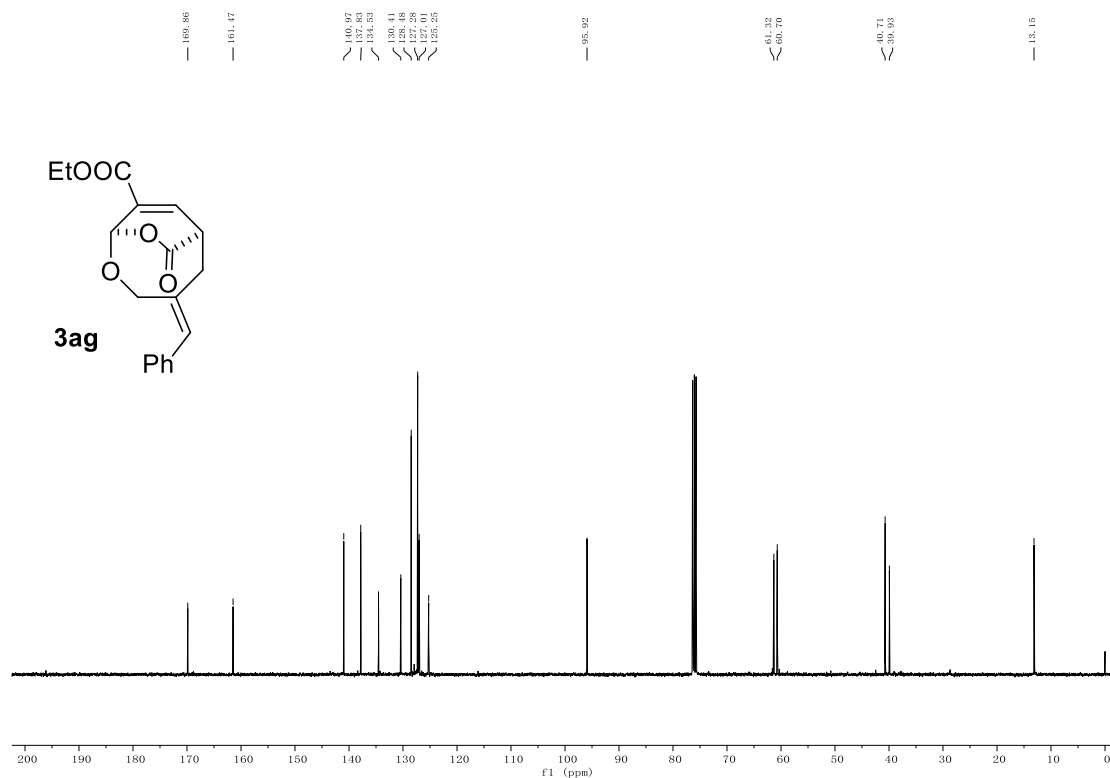

<sup>13</sup>C NMR of **3ag** (101 MHz, CDCl<sub>3</sub>)

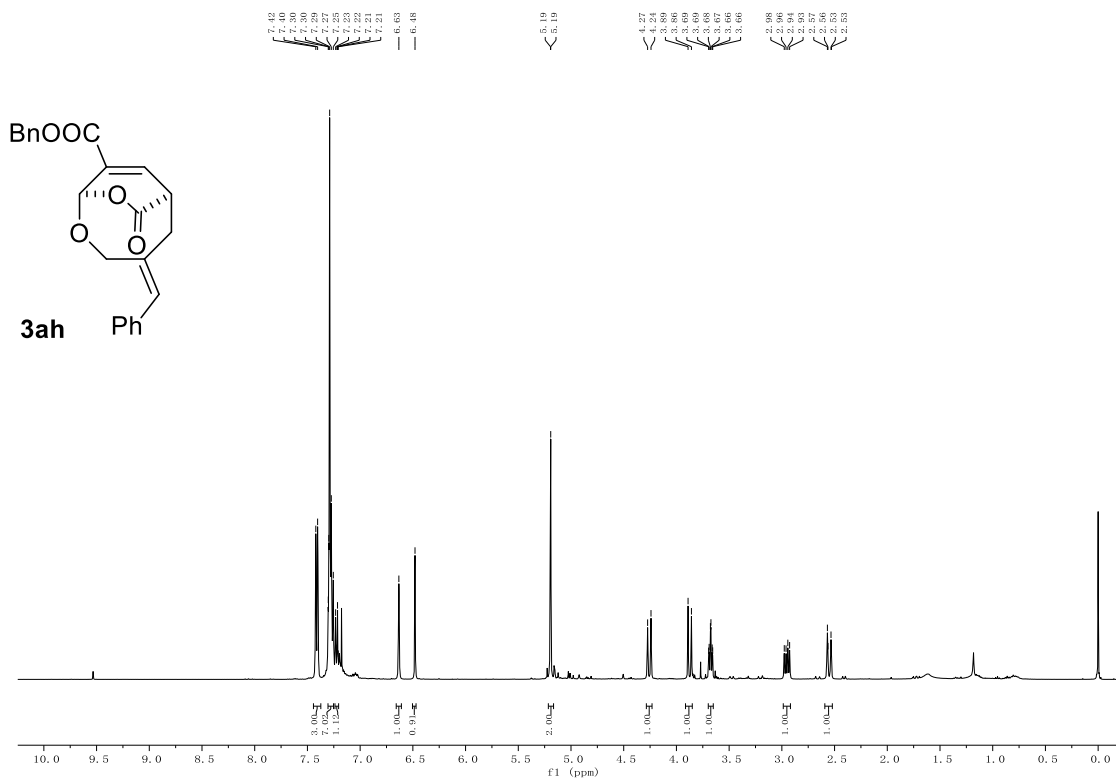

<sup>1</sup>H NMR of **3ah** (400 MHz, CDCl<sub>3</sub>)

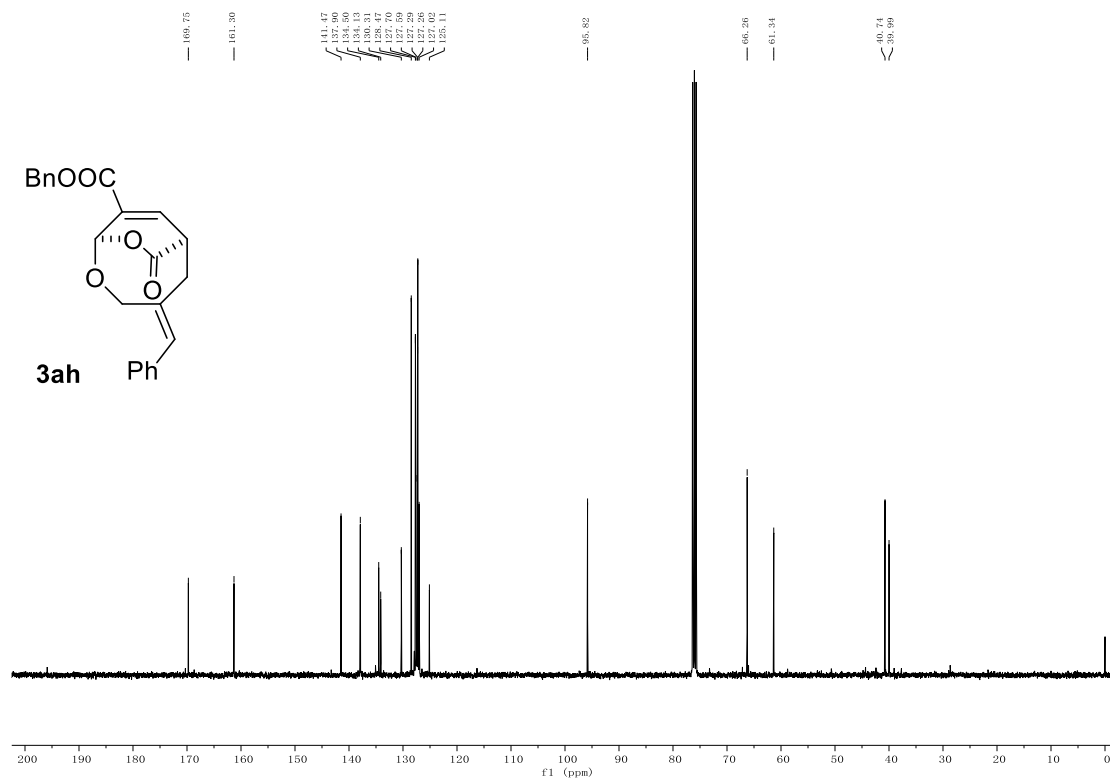

<sup>13</sup>C NMR of **3ah** (101 MHz, CDCl<sub>3</sub>)

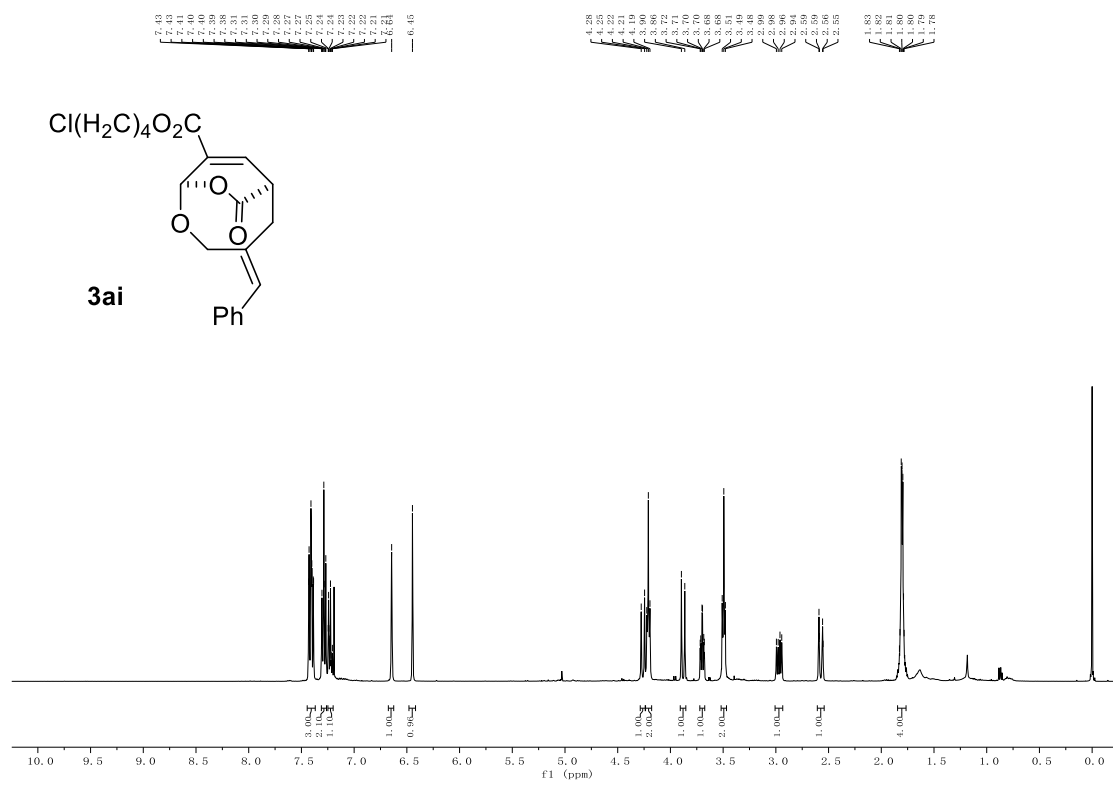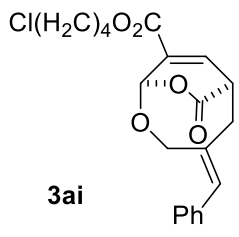

**<sup>1</sup>H NMR of 3ai (400 MHz, CDCl<sub>3</sub>)**

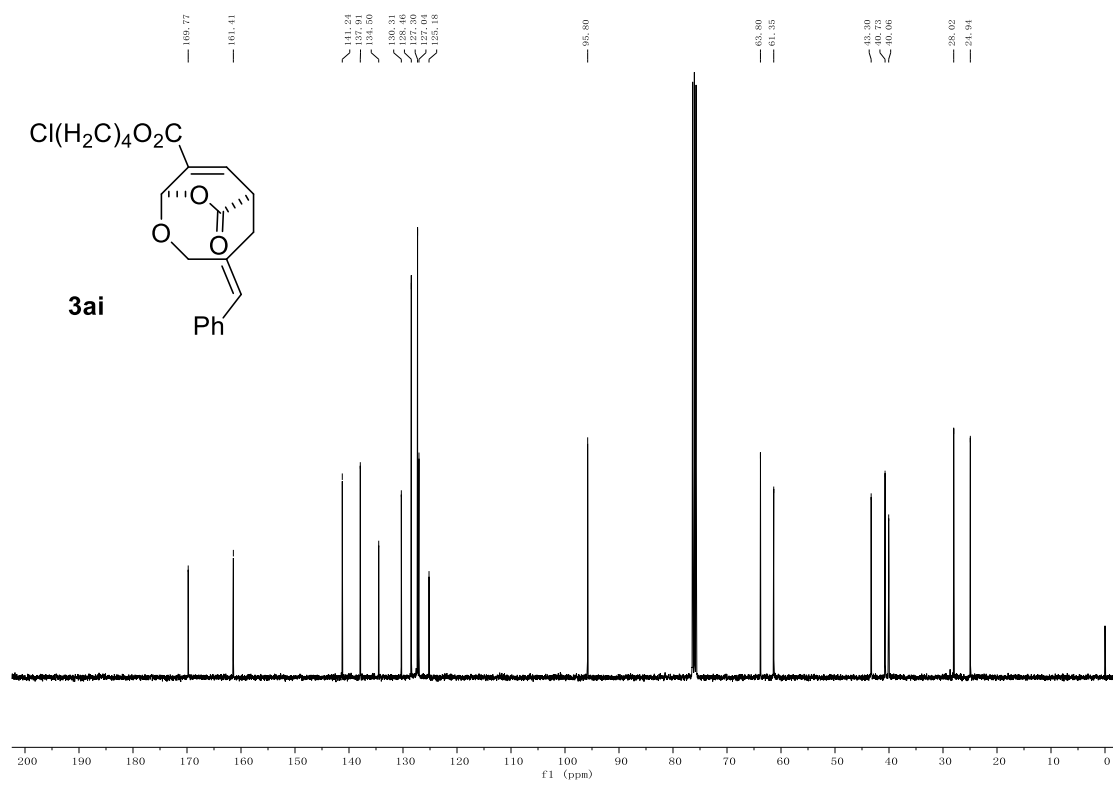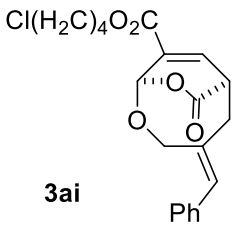

**<sup>13</sup>C NMR of 3ai (101 MHz, CDCl<sub>3</sub>)**

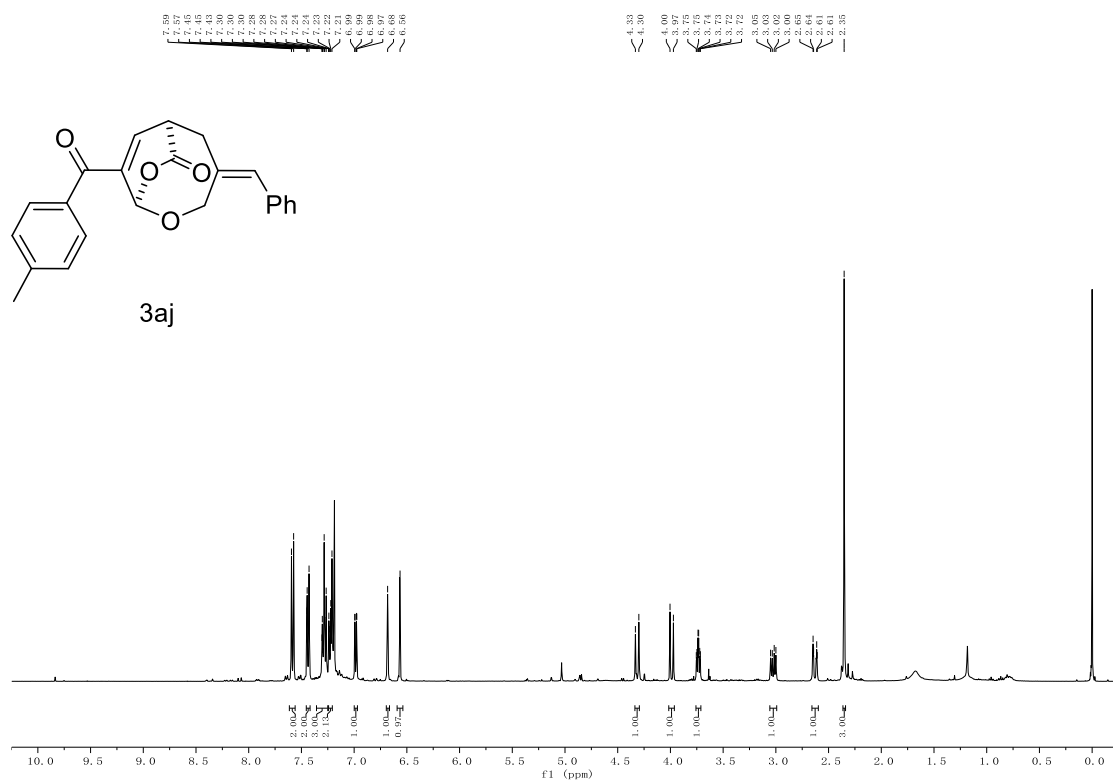

<sup>1</sup>H NMR of **3aj** (400 MHz, CDCl<sub>3</sub>)

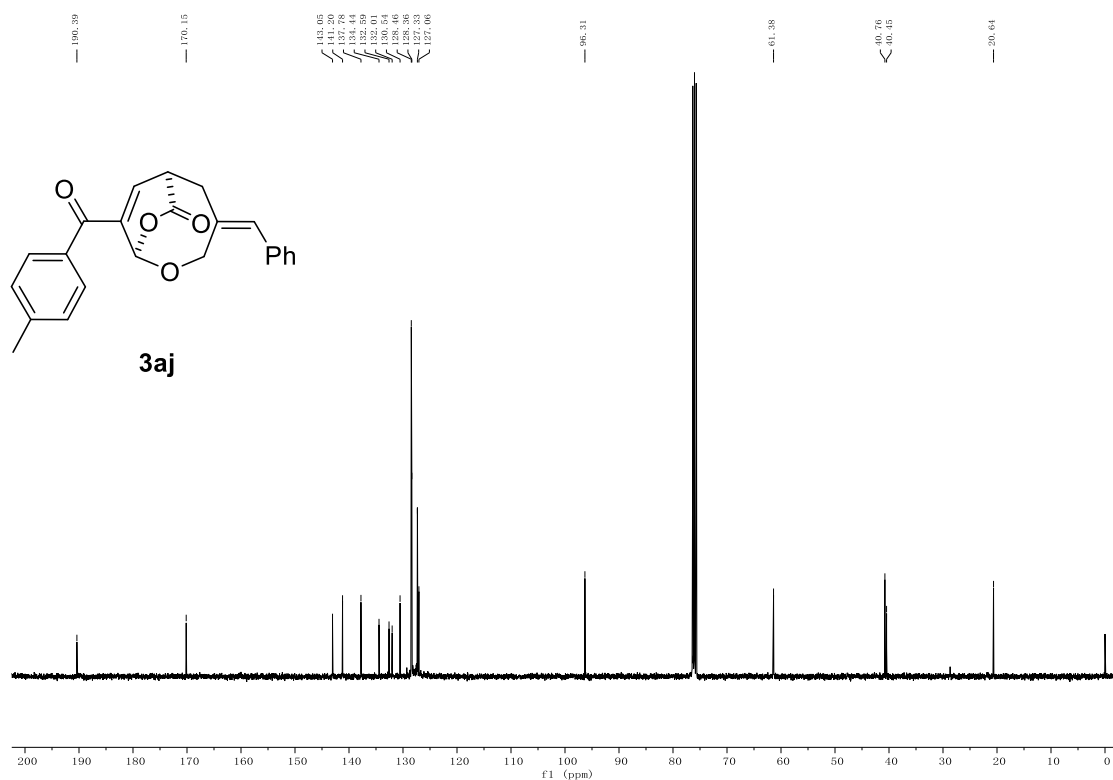

<sup>13</sup>C NMR of **3aj** (101 MHz, CDCl<sub>3</sub>)

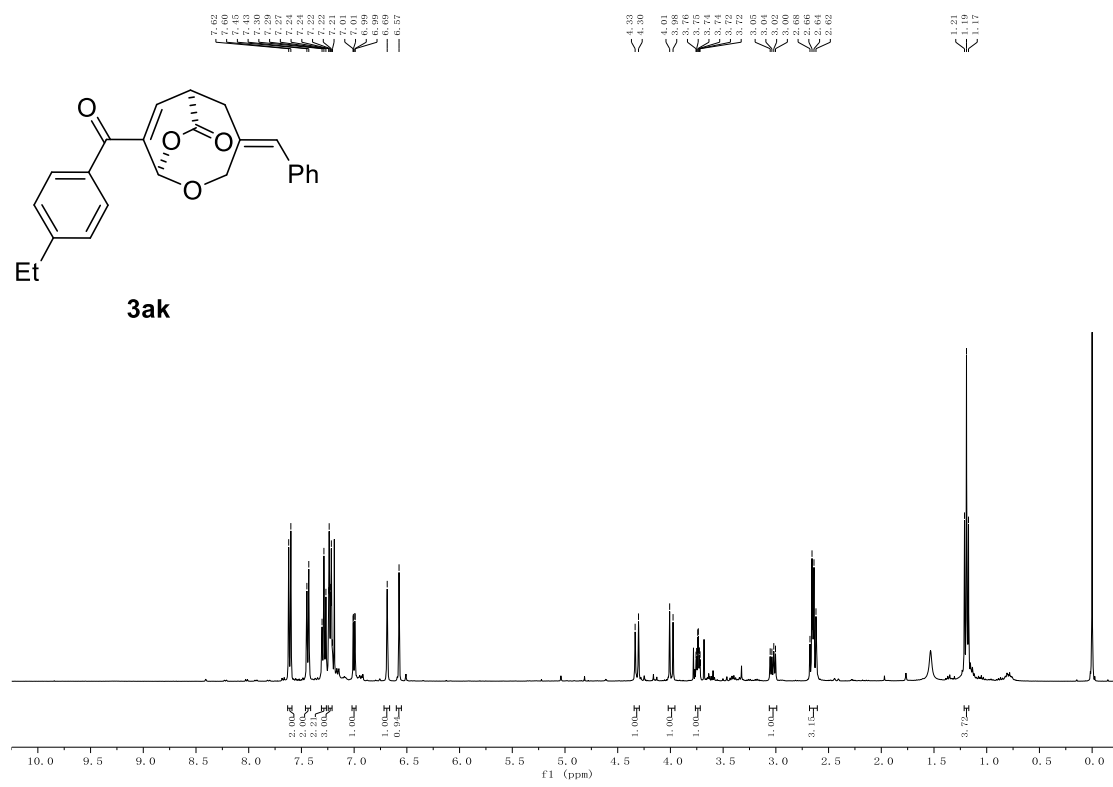

<sup>1</sup>H NMR of **3ak** (400 MHz, CDCl<sub>3</sub>)

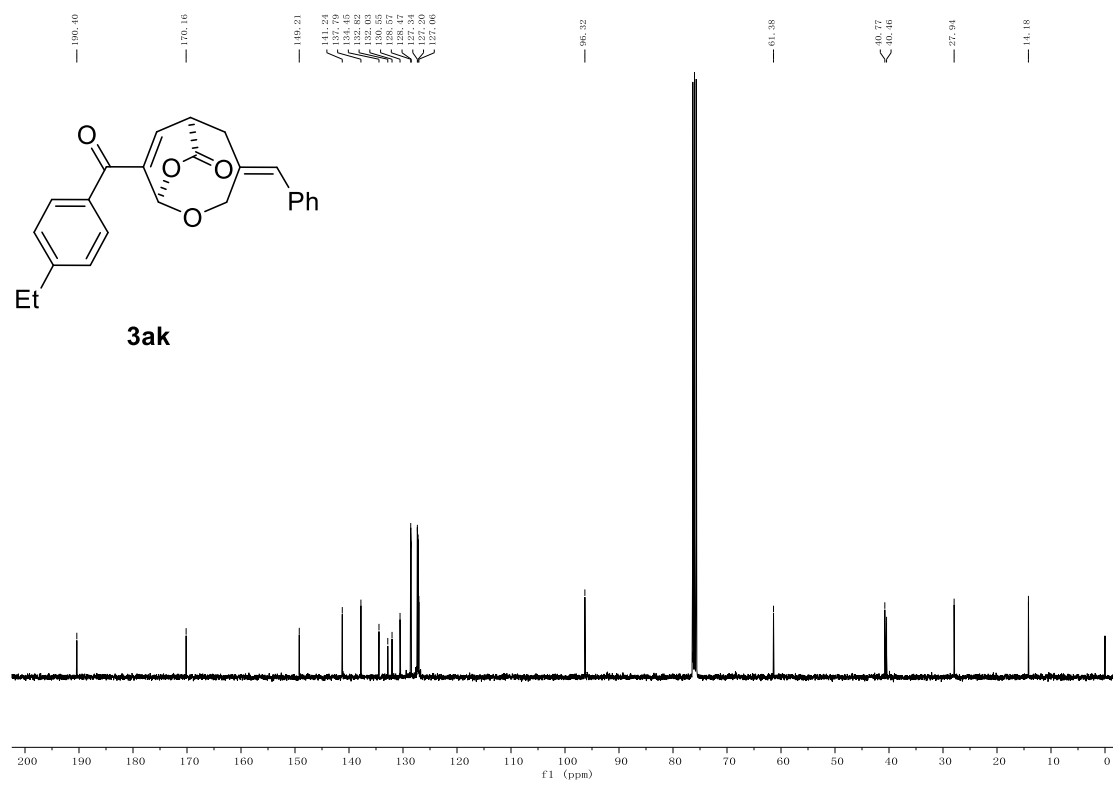

<sup>13</sup>C NMR of **3ak** (101 MHz, CDCl<sub>3</sub>)

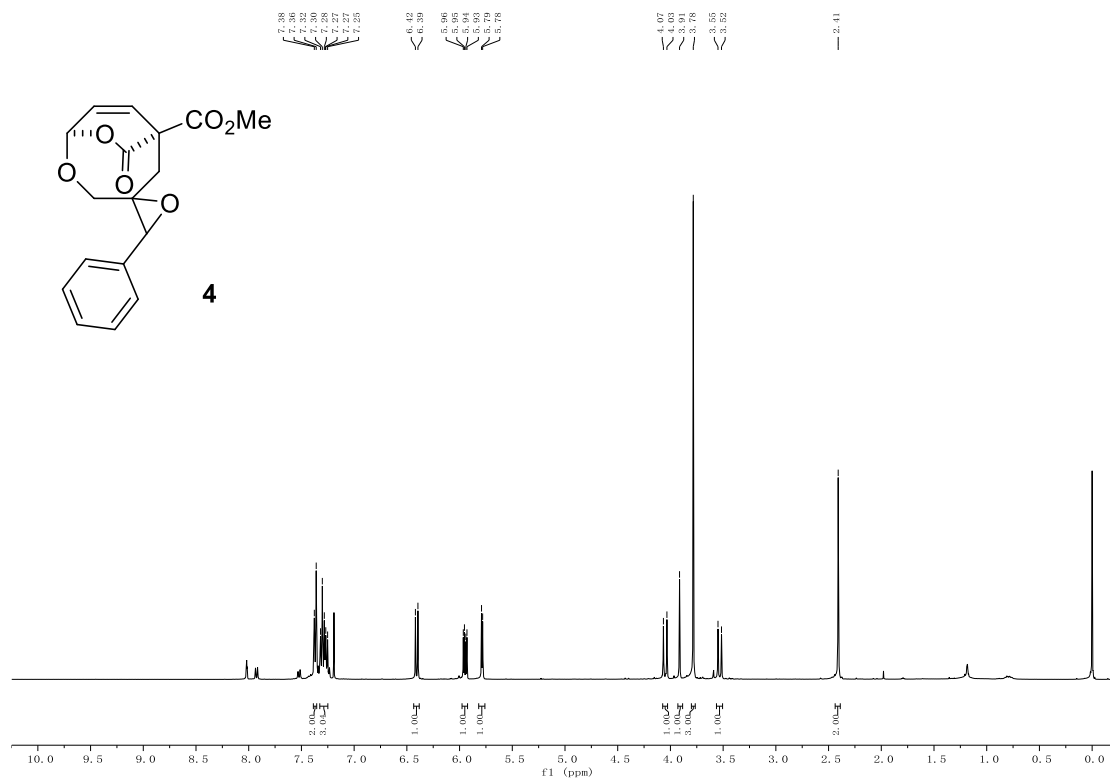

$^1\text{H NMR}$  of **4** (400 MHz,  $\text{CDCl}_3$ )

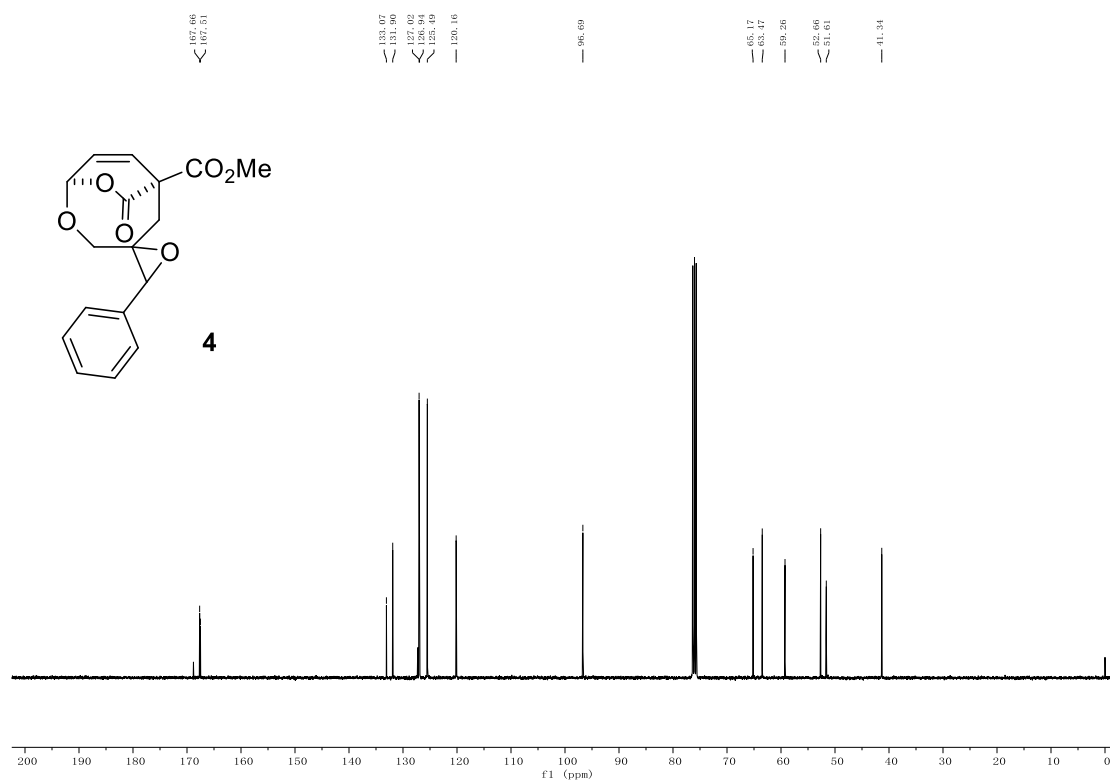

$^{13}\text{C NMR}$  of **4** (101 MHz,  $\text{CDCl}_3$ )



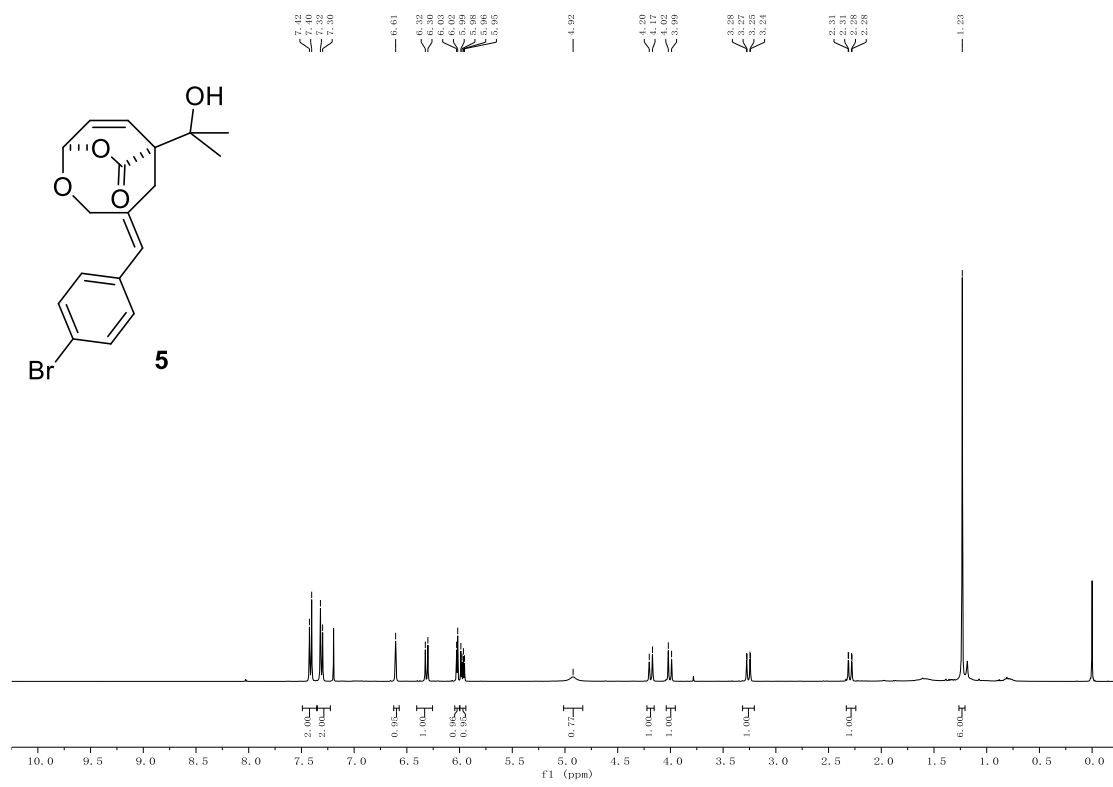

**<sup>1</sup>H NMR of 5 (400 MHz, CDCl<sub>3</sub>)**

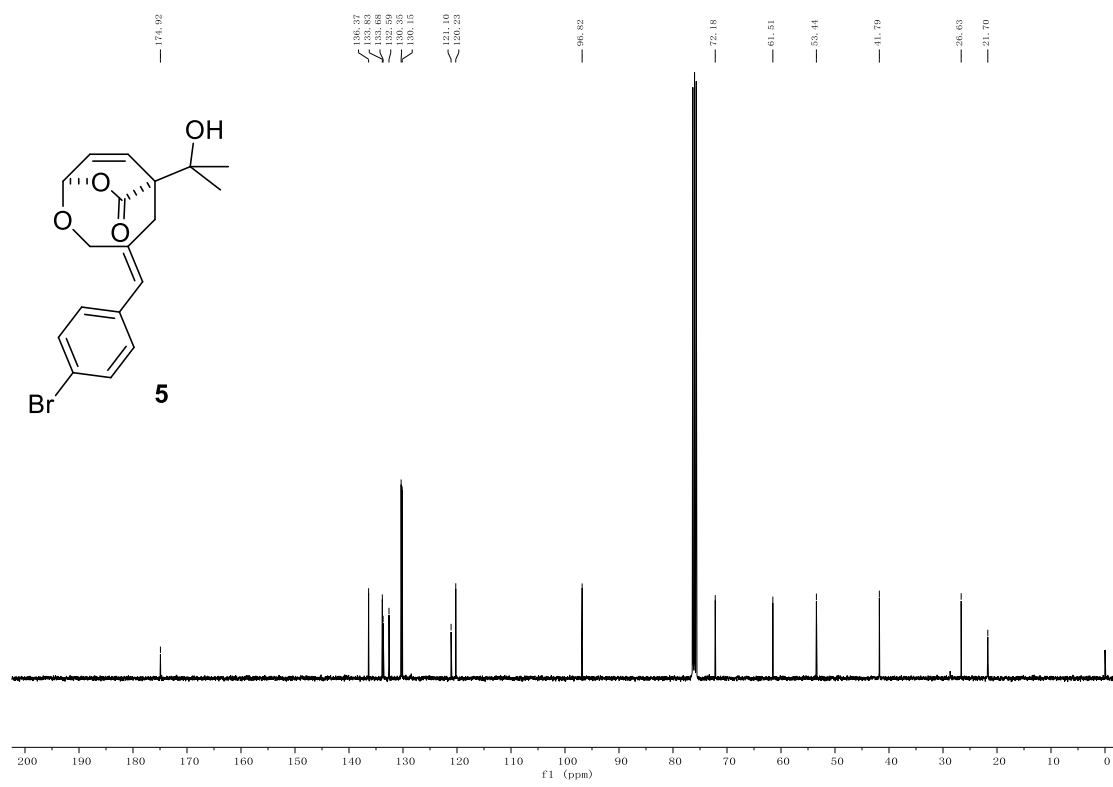

**<sup>13</sup>C NMR of 5 (101 MHz, CDCl<sub>3</sub>)**

## X-Ray single crystal data of product 3ha

The X-ray crystallographic structures for **3ha**. ORTEP view of the molecules of complex **3ha**, showing ellipsoids at 50% probability level. Crystal data have been deposited to CCDC, number **3ha** (2330507). A summary of the fundamental crystal and refinement data are given in the Table 1 of the Supporting Information. White crystals suitable for X-ray diffraction were grown by EtOH/CH<sub>2</sub>Cl<sub>2</sub> solution of **3ha** in a 4 mL bottle.

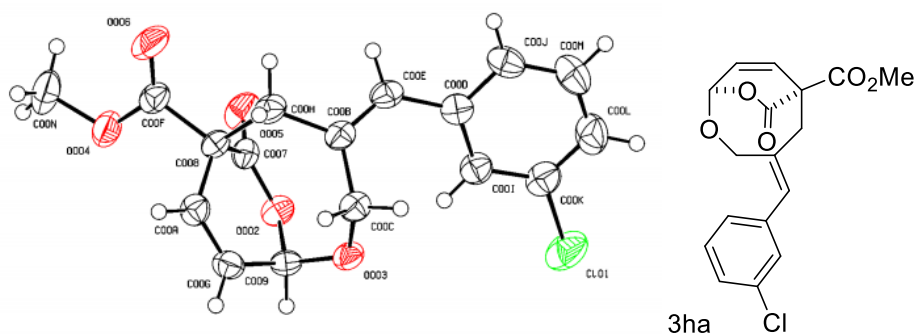

Crystal structure of **3ha**

Table 1 Crystal data and structure refinement for **3ha**.

|                                    |                                                  |
|------------------------------------|--------------------------------------------------|
| Identification code                | 3ha                                              |
| Empirical formula                  | C <sub>17</sub> H <sub>15</sub> ClO <sub>5</sub> |
| Formula weight                     | 334.74                                           |
| Temperature/K                      | 296.15                                           |
| Crystal system                     | monoclinic                                       |
| Space group                        | P2 <sub>1</sub> /c                               |
| a/Å                                | 18.4419(16)                                      |
| b/Å                                | 7.0128(6)                                        |
| c/Å                                | 12.0067(11)                                      |
| α/°                                | 90                                               |
| β/°                                | 93.703(2)                                        |
| γ/°                                | 90                                               |
| Volume/Å <sup>3</sup>              | 1549.6(2)                                        |
| Z                                  | 4                                                |
| ρ <sub>calc</sub> /cm <sup>3</sup> | 1.435                                            |
| μ/mm <sup>-1</sup>                 | 0.270                                            |
| F(000)                             | 696.0                                            |
| Crystal size/mm <sup>3</sup>       | 0.2 × 0.15 × 0.1                                 |

|                                                  |                                                                  |
|--------------------------------------------------|------------------------------------------------------------------|
| Radiation                                        | MoK $\alpha$ ( $\lambda = 0.71073$ )                             |
| 2 $\Theta$ range for data collection/ $^{\circ}$ | 2.212 to 54.868                                                  |
| Index ranges                                     | $-23 \leq h \leq 22$ , $-8 \leq k \leq 9$ , $-13 \leq l \leq 15$ |
| Reflections collected                            | 8964                                                             |
| Independent reflections                          | 3460 [ $R_{\text{int}} = 0.0235$ , $R_{\text{sigma}} = 0.0288$ ] |
| Data/restraints/parameters                       | 3460/0/209                                                       |
| Goodness-of-fit on $F^2$                         | 1.028                                                            |
| Final R indexes [ $I \geq 2\sigma(I)$ ]          | $R_1 = 0.0401$ , $wR_2 = 0.0978$                                 |
| Final R indexes [all data]                       | $R_1 = 0.0603$ , $wR_2 = 0.1096$                                 |
| Largest diff. peak/hole / e $\text{\AA}^{-3}$    | 0.22/-0.27                                                       |
